# Supplementary material for: Characterization of Yak Common Biofluids Metabolome by Means of Proton Nuclear Magnetic Resonance Spectroscopy
Source: MDPI journal article supplement (doi:10.3390/metabo9030041), 2019-03-02

# Characterization of yak common biofluids metabolome by means of proton nuclear magnetic resonance spectroscopy

Chenglin Zhu, Cheng Li, Yaning Wang, Luca Laghi

## SUPPLEMENTAL MATERIAL

**Table S1:** Metabolites identified by <sup>1</sup>H-NMR in yak biofluids.

| Molecules                  | ppm    | Functional group   | Multiplicity | Molecule source | Groups              |
|----------------------------|--------|--------------------|--------------|-----------------|---------------------|
| 1,3-Dihydroxyacetone       | 4.4122 | CH <sub>2</sub>    | s            | D               | Serum               |
| 2,6-Dihydroxybenzoate      | 6.4221 | CH-2               | d            | D               | Urine               |
| 2-Aminobutyrate            | 0.9648 | CH <sub>3</sub>    | t            | P               | Serum               |
| 2-Hydroxy-3-methylvalerate | 0.9310 | CH <sub>3</sub> -9 | d            | P               | Urine               |
| 2-Hydroxybutyrate          | 0.8859 | CH <sub>3</sub>    | t            | P               | Serum               |
| 2-Hydroxyisobutyrate       | 1.3478 | CH <sub>3</sub>    | s            | D               | Urine               |
| 2-Hydroxyisovalerate       | 0.8244 | CH <sub>3</sub>    | d            | P               | Urine               |
| 2-Hydroxyvalerate          | 0.8970 | CH <sub>3</sub>    | t            | E               | Urine               |
| 2-Oxoisocaproate           | 2.6038 | CH <sub>2</sub>    | d            | P               | Feces               |
| 3-Hydroxybutyrate          | 1.1863 | CH <sub>3</sub>    | d            | E               | Serum, Urine, Feces |
| 3-Hydroxyisobutyrate       | 1.0503 | CH <sub>3</sub>    | d            | P               | Serum, Urine        |
| 3-Hydroxyisovalerate       | 1.2585 | CH <sub>3</sub>    | s            | P               | Urine               |
| 3-Hydroxyphenylacetate     | 3.4718 | CH <sub>2</sub>    | s            | P               | Urine               |
| 3-Indoxylsulfate           | 7.6894 | CH-6               | d            | D, P            | Urine               |
| 3-Methyl-2-oxovalerate     | 1.1042 | CH <sub>3</sub> -9 | d            | P               | Urine               |
| 3-Methylglutarate          | 0.9095 | CH <sub>3</sub>    | d            | P               | Urine               |
| 3-Methylhistidine          | 7.1366 | CH-5               | s            | P               | Serum               |
| 3-Phenylpropionate         | 2.8659 | CH <sub>2</sub> -7 | m            | p               | Urine, Feces        |
| 4-Hydroxyphenylacetate     | 6.8582 | CH-3               | d            | D               | Urine, Feces        |
| Acetate                    | 1.9071 | CH <sub>3</sub>    | s            | P               | Serum, Urine, Feces |
| Acetoacetate               | 2.2688 | CH <sub>3</sub>    | s            | E               | Serum, Feces        |
| Acetoin                    | 1.3583 | CH <sub>3</sub> -3 | d            | E               | Feces               |
| Acetone                    | 2.2178 | CH <sub>3</sub>    | s            | E               | Serum, Feces        |
| Adenosine                  | 8.3436 | CH-7               | s            | P               | Urine               |
| Alanine                    | 1.4675 | CH <sub>3</sub>    | d            | P               | Serum, Urine, Feces |
| Allantoin                  | 5.3643 | CH                 | s            | P, M            | Urine               |
| Arabinose                  | 4.5038 | CH-2               | d            | M, E            | Serum               |
| Arginine                   | 1.9229 | CH <sub>2</sub> -6 | m            | P               | Serum               |

|                       |        |                    |    |      |                     |
|-----------------------|--------|--------------------|----|------|---------------------|
| Ascorbate             | 4.5072 | CH                 | d  | D, E | Urine               |
| Asparagine            | 2.9282 | CH <sub>2</sub>    | dd | P    | Serum               |
| Aspartate             | 2.7842 | CH <sub>2</sub>    | dd | P    | Serum, Feces        |
| <i>beta</i> -Alanine  | 2.5558 | CH <sub>2</sub> -4 | t  | P    | Serum, Urine        |
| Betaine               | 3.8894 | CH <sub>2</sub>    | s  | P    | Serum, Urine        |
| Butyrate              | 0.8818 | CH <sub>3</sub>    | t  | E    | Feces               |
| Carnitine             | 3.2208 | CH <sub>3</sub>    | s  | E    | Serum, Feces        |
| Choline               | 3.1888 | CH <sub>3</sub>    | s  | E, P | Serum, Feces        |
| <i>cis</i> -Aconitate | 3.1089 | CH <sub>2</sub>    | d  | E    | Urine               |
| Citrate               | 2.5093 | CH <sub>2</sub>    | d  | P    | Serum, Urine        |
| Creatine              | 3.0222 | CH <sub>2</sub>    | s  | P    | Serum, Urine, Feces |
| Creatinine            | 3.0325 | CH <sub>3</sub>    | s  | P    | Serum, Urine        |
| Dimethyl sulfone      | 3.1391 | CH <sub>3</sub>    | s  | D, M | Serum, Urine, Feces |
| Dimethylamine         | 2.7117 | CH <sub>3</sub>    | s  | P    | Serum, Urine        |
| Dimethylglycine       | 2.9124 | CH <sub>3</sub>    | s  | E, P | Serum, Urine        |
| Ethanol               | 1.1699 | CH <sub>3</sub>    | t  | E, M | Serum, Urine, Feces |
| Ethylmalonate         | 1.7091 | CH <sub>2</sub>    | m  | E    | Urine               |
| Formate               | 8.4446 | CH                 | s  | E    | Serum, Urine, Feces |
| Fucose                | 1.2024 | CH <sub>3</sub>    | d  | E    | Urine, Feces        |
| Fumarate              | 6.5090 | CH-5               | s  | E    | Serum, Feces        |
| Galactarate           | 4.2597 | CH                 | s  | E    | Urine               |
| Galactose             | 4.5825 | CH-2               | d  | E    | Feces               |
| Gluconate             | 4.1362 | CH-9               | d  | E    | Urine               |
| Glucose               | 3.2233 | CH-2               | dd | D, E | Serum, Urine, Feces |
| Glutamate             | 2.0606 | CH <sub>2</sub> -6 | m  | P    | Serum, Feces        |
| Glutamine             | 2.4430 | CH                 | m  | P    | Serum, Urine        |
| Glutarate             | 2.1540 | CH <sub>2</sub>    | t  | E, P | Urine, Feces        |
| Glycerol              | 3.5664 | CH <sub>2</sub>    | dd | E    | Serum, Feces        |
| Glycine               | 3.5533 | CH <sub>2</sub>    | s  | P    | Serum, Urine, Feces |
| Guanidoacetate        | 3.7782 | CH <sub>2</sub>    | s  | P    | Urine               |
| Guanosine             | 5.8929 | CH-2               | d  | P    | Urine               |
| Hippurate             | 3.9607 | CH <sub>2</sub>    | d  | P    | Urine               |
| Isobutyrate           | 1.0473 | CH <sub>3</sub>    | d  | M    | Urine, Feces        |
| Isocaproate           | 1.4133 | CH <sub>2</sub> -5 | m  | E    | Urine               |
| Isoleucine            | 1.0020 | CH <sub>3</sub> -9 | d  | P    | Serum, Urine, Feces |
| Isovalerate           | 0.9030 | CH <sub>3</sub>    | d  | P    | Feces               |
| Lactate               | 4.1059 | CH                 | dd | E    | Serum, Urine, Feces |
| Leucine               | 0.9356 | CH <sub>3</sub> -9 | d  | P    | Serum, Feces        |
| Lysine                | 3.0077 | CH <sub>2</sub> -9 | t  | P    | Serum               |
| Malonate              | 3.1199 | CH <sub>2</sub>    | s  | D, E | Urine               |
| Mannose               | 5.1767 | CH-6               | d  | E    | Serum               |
| Methanol              | 3.3481 | CH <sub>3</sub>    | s  | E    | Serum, Urine, Feces |
| Methionine            | 2.6178 | CH <sub>2</sub> -3 | t  | P    | Serum, Feces        |

|                         |        |                     |    |      |                     |
|-------------------------|--------|---------------------|----|------|---------------------|
| Methylamine             | 2.5878 | CH <sub>3</sub>     | s  | D    | Urine, Feces        |
| Methylsuccinate         | 1.0742 | CH <sub>3</sub>     | d  | P, E | Serum, Urine        |
| myo-Inositol            | 4.0585 | CH-2                | t  | E    | Serum, Urine        |
| N-Acetylglucosamine     | 5.1989 | CH                  | d  | E, P | Feces               |
| N-Carbamoylaspartate    | 2.6698 | CH <sub>2</sub>     | dd | P    | Serum               |
| N-Methylhydantoin       | 2.9129 | CH <sub>3</sub>     | s  | P    | Feces               |
| N-Phenylacetyl glycine  | 3.6605 | CH <sub>2</sub> -11 | s  | P    | Urine, Feces        |
| O-Acetylcholine         | 3.2081 | CH <sub>3</sub>     | s  | E    | Feces               |
| O-Phosphocholine        | 3.1977 | CH <sub>3</sub>     | s  | E    | Feces               |
| Ornithine               | 3.0440 | CH <sub>2</sub> -8  | t  | P    | Serum               |
| <i>p</i> -Cresol        | 6.8170 | CH-2                | d  | P    | Urine               |
| Phenylacetate           | 7.2826 | CH-4                | m  | P    | Feces               |
| Phenylalanine           | 7.3669 | CH-4                | t  | P    | Serum, Feces        |
| Proline                 | 1.9998 | CH <sub>2</sub> -3  | m  | P    | Serum               |
| Propionate              | 1.0292 | CH <sub>3</sub>     | t  | P    | Feces               |
| Propylene glycol        | 1.1227 | CH <sub>3</sub>     | d  | E    | Serum, Urine        |
| Pyruvate                | 2.3573 | CH <sub>3</sub>     | s  | E    | Serum, Urine        |
| Sarcosine               | 2.7262 | CH <sub>3</sub>     | s  | P    | Serum, Urine        |
| Serine                  | 3.9555 | CH <sub>2</sub>     | dd | P    | Serum, Feces        |
| Serotonin               | 3.3023 | CH <sub>2</sub>     | t  | P    | Urine               |
| Succinate               | 2.3933 | CH <sub>2</sub>     | s  | P, E | Serum, Urine, Feces |
| Tartrate                | 4.3311 | CH                  | s  | D    | Urine               |
| Taurine                 | 3.2368 | CH <sub>2</sub> -6  | t  | P    | Urine               |
| Threonine               | 3.5838 | CH-4                | d  | P    | Serum, Feces        |
| Tiglylglycine           | 6.4968 | CH                  | m  | P    | Urine               |
| <i>trans</i> -Aconitate | 6.5814 | CH                  | s  | E    | Urine               |
| Trehalose               | 5.1837 | CH                  | s  | E    | Feces               |
| Trigonelline            | 4.4165 | CH <sub>3</sub>     | s  | D    | Urine               |
| Trimethylamine          | 2.8226 | CH <sub>3</sub>     | s  | D    | Serum, Urine        |
| Trimethylamine N-oxide  | 3.2589 | CH <sub>3</sub>     | s  | D    | Urine               |
| Tyrosine                | 7.1776 | CH-3                | d  | P    | Serum, Urine, Feces |
| Uracil                  | 5.7903 | CH-5                | d  | P    | Serum, Feces        |
| Uridine                 | 5.9079 | CH-2                | d  | P    | Serum               |
| Valerate                | 0.8756 | CH <sub>3</sub>     | t  | D    | Feces               |
| Valine                  | 1.0206 | CH <sub>3</sub> -7  | d  | P    | Serum, Urine, Feces |
| Xanthosine              | 5.8460 | CH-2                | d  | P    | Urine               |
| Xylose                  | 4.5781 | CH-2                | d  | E    | Urine               |

---

## Molecules assignment and quantification

**Figures S1-S36:** Pictorial description of the molecules assignment procedure by Chenomx software. Upper panel - portions of the representative spectrum. Lower panel - The spectrum (black line) superimposed to the simulated signals (red line) for each of the molecules listed. The line connecting each name with the spectra highlights the signal used for quantification purposes.

### Yak Serum

1

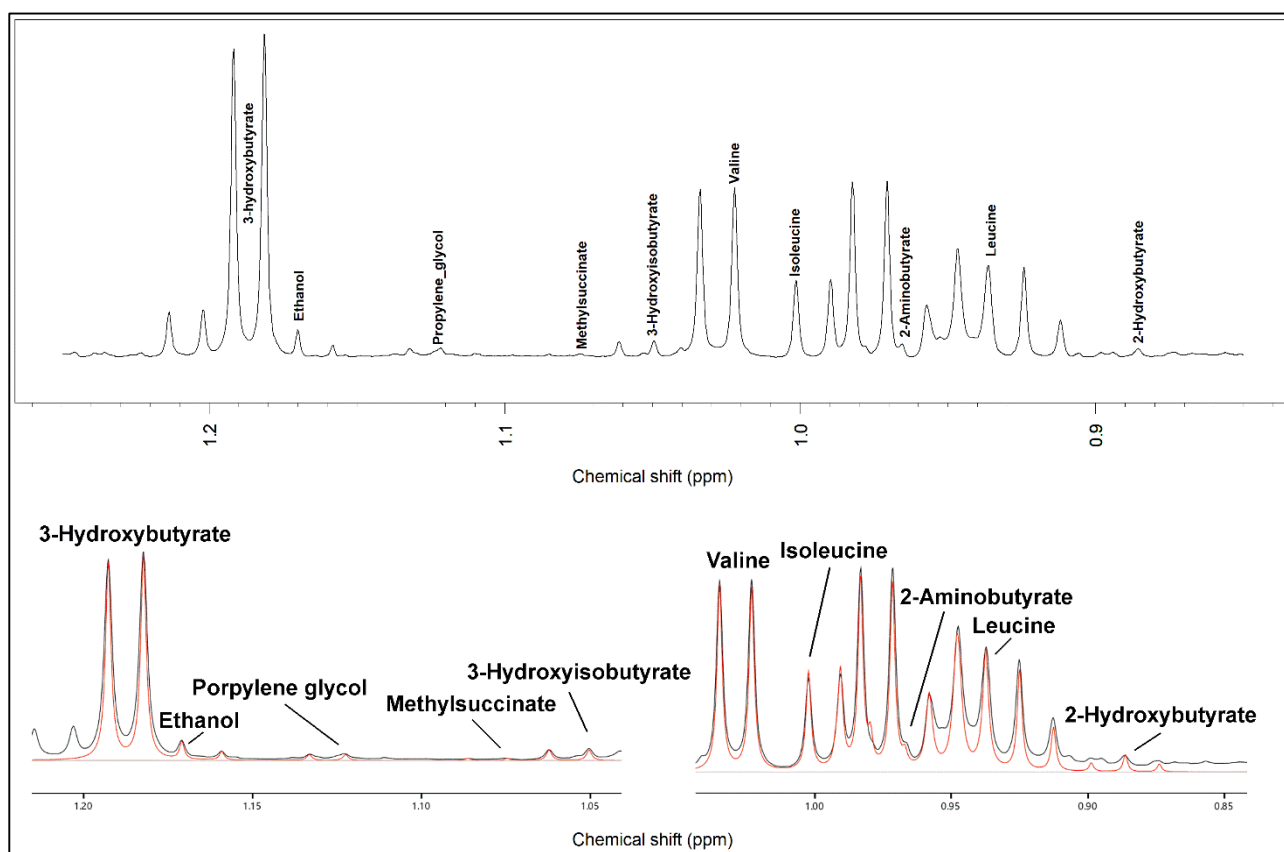

2

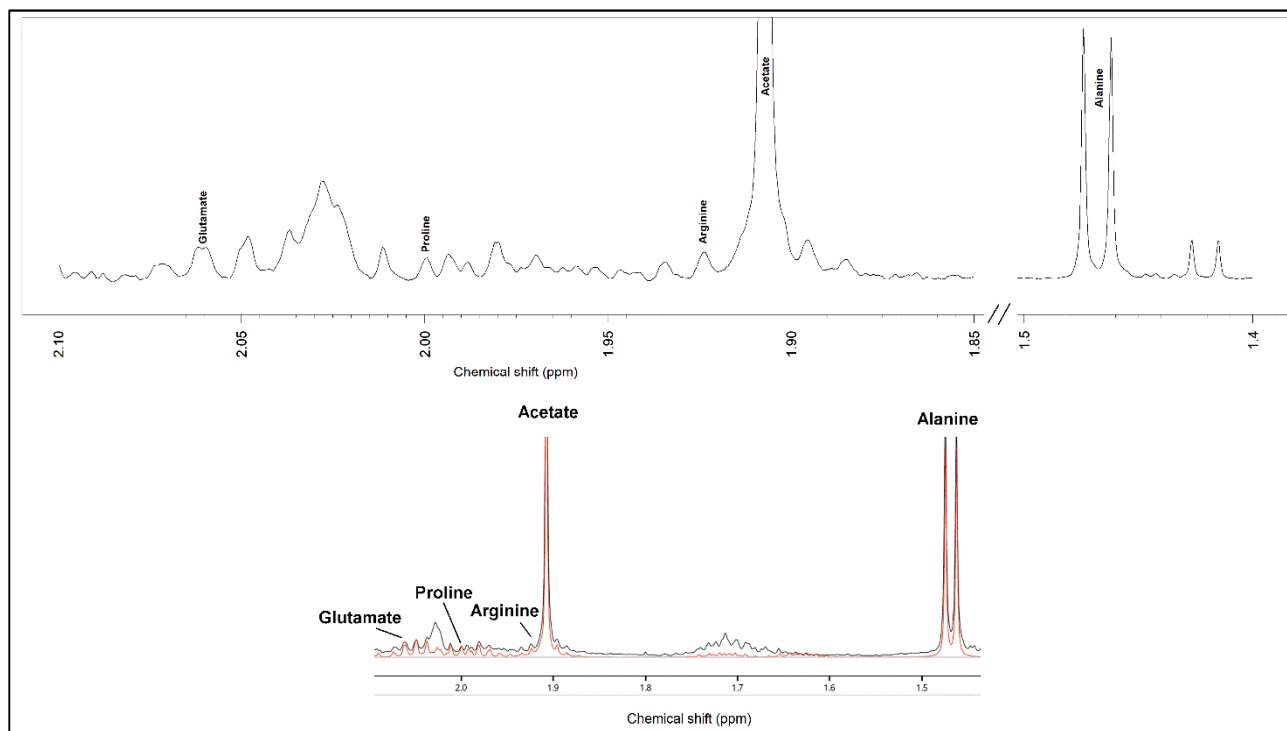

3

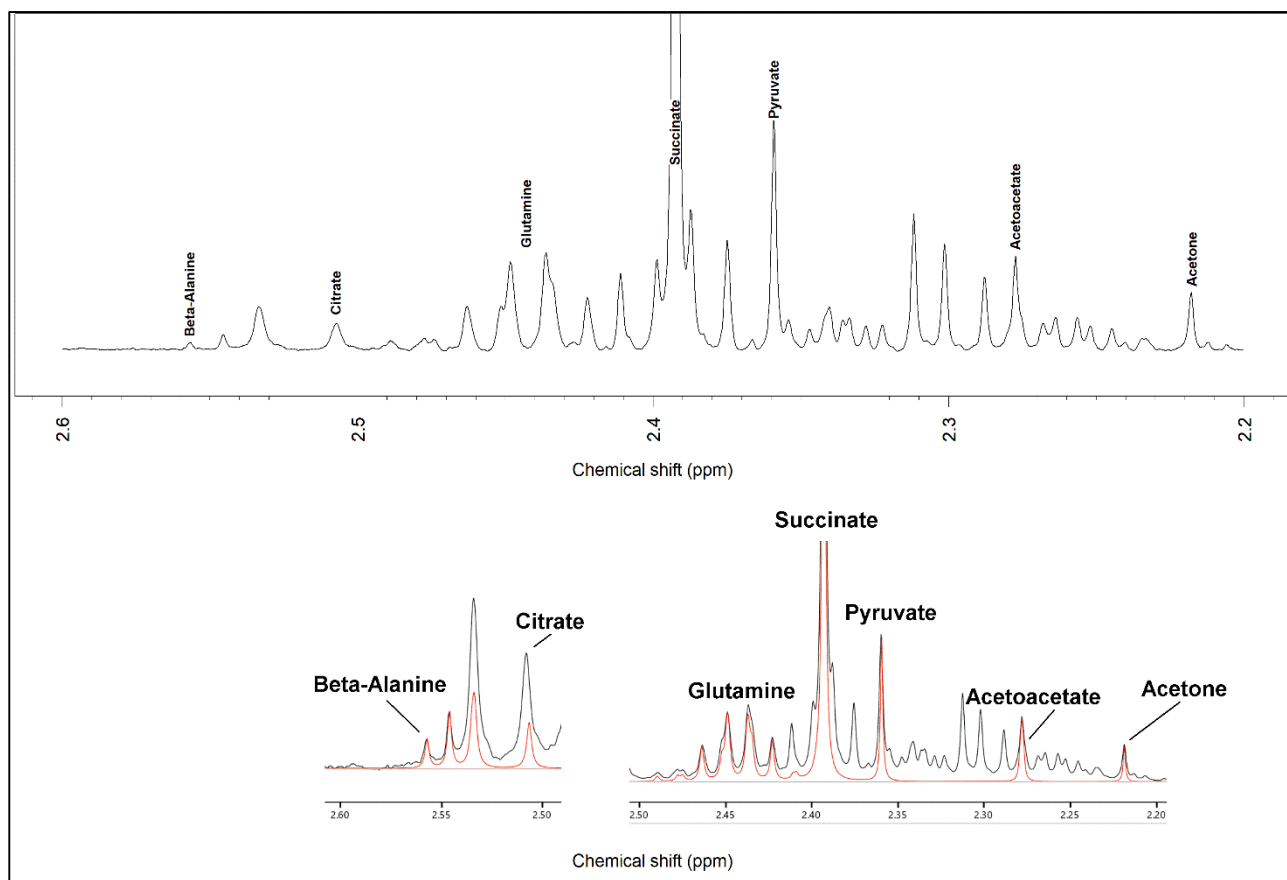

4

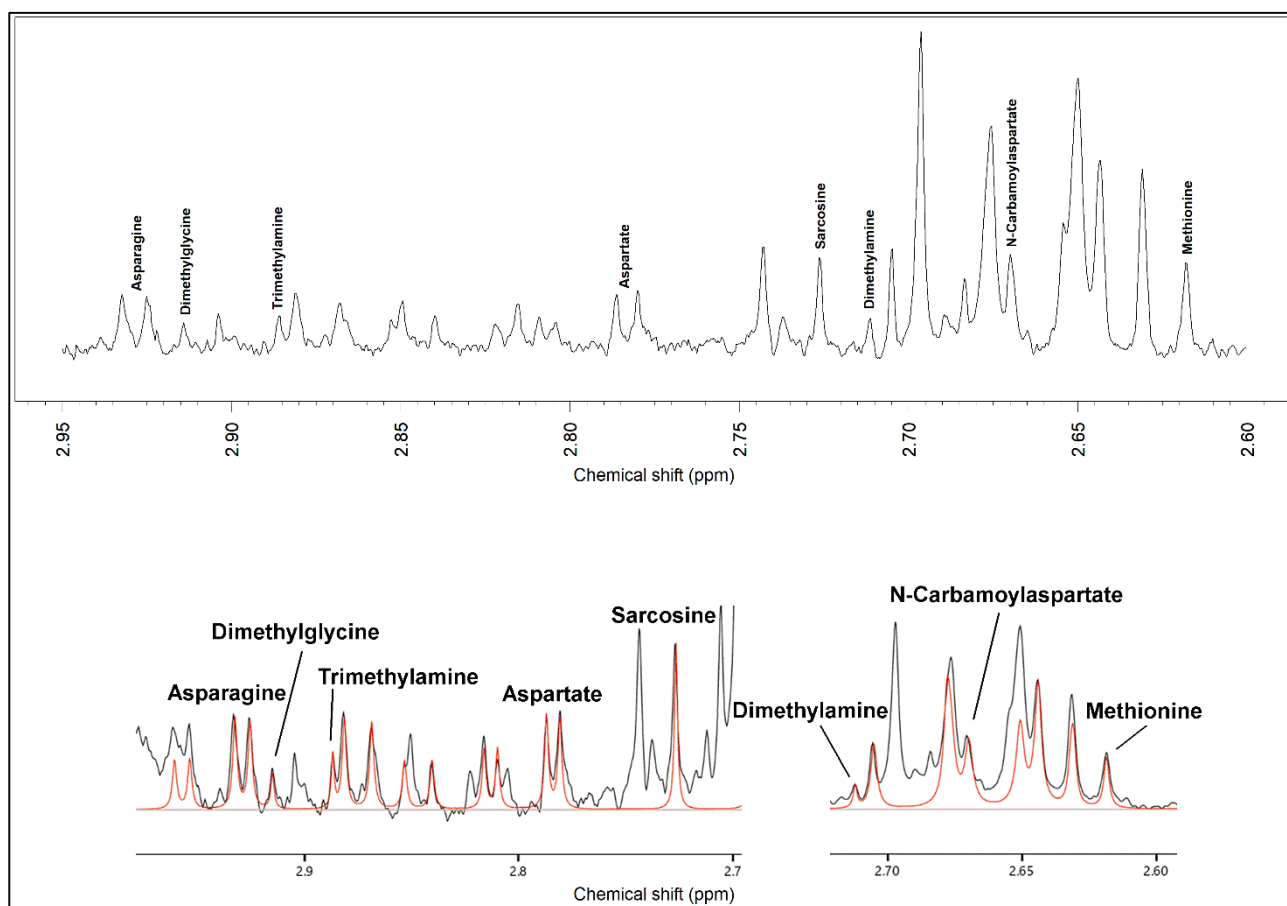

5

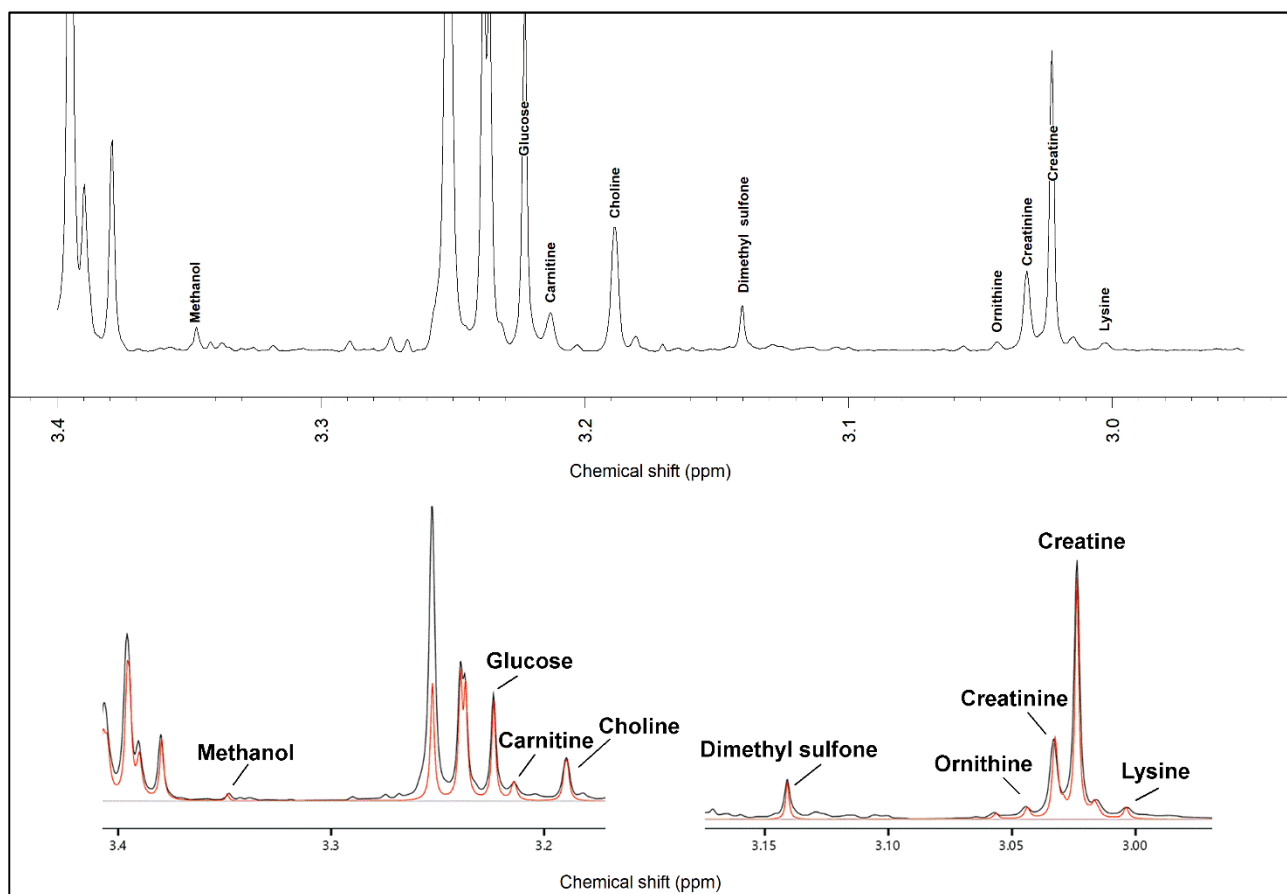

6

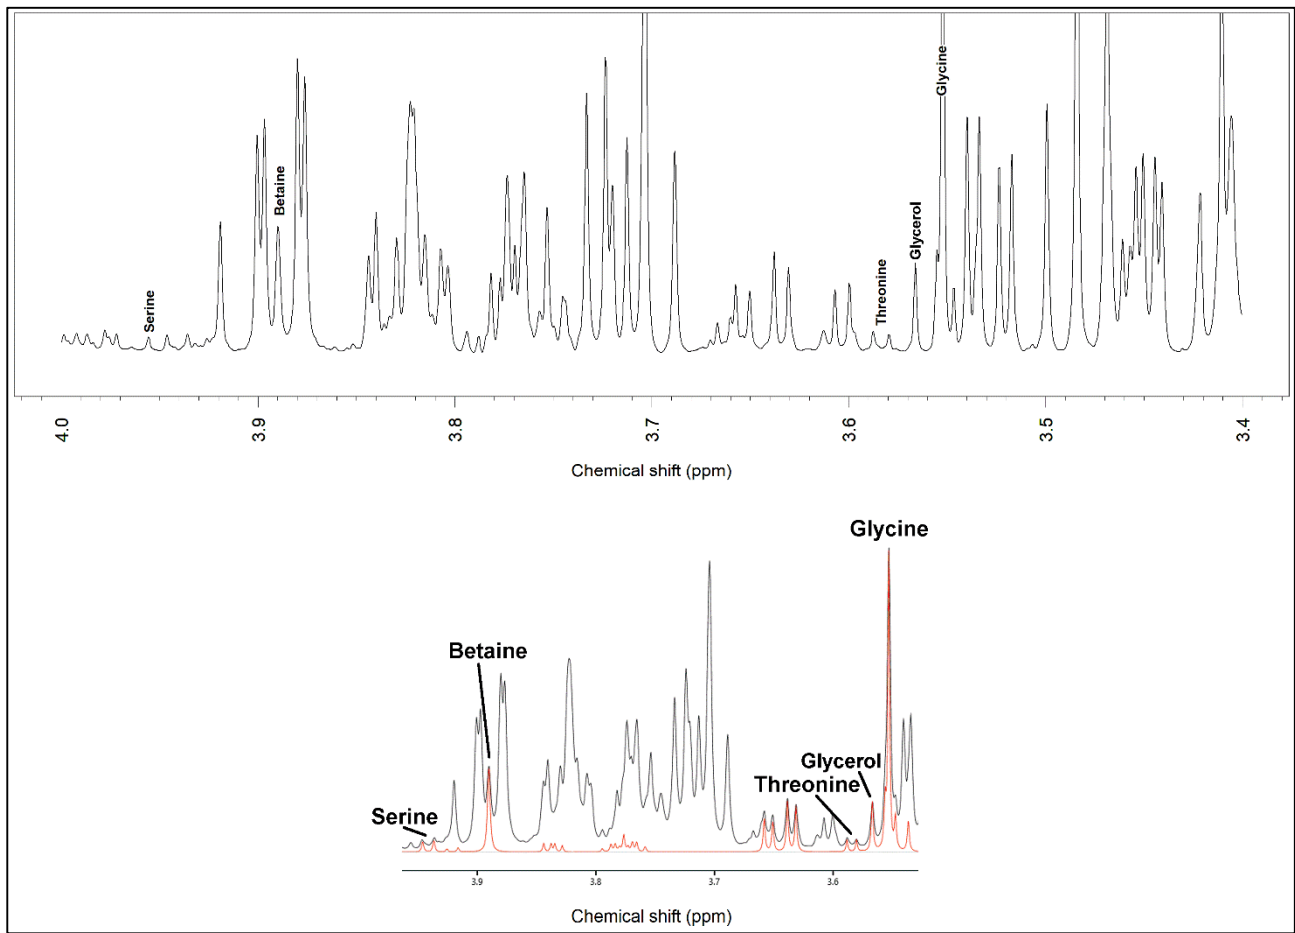

7

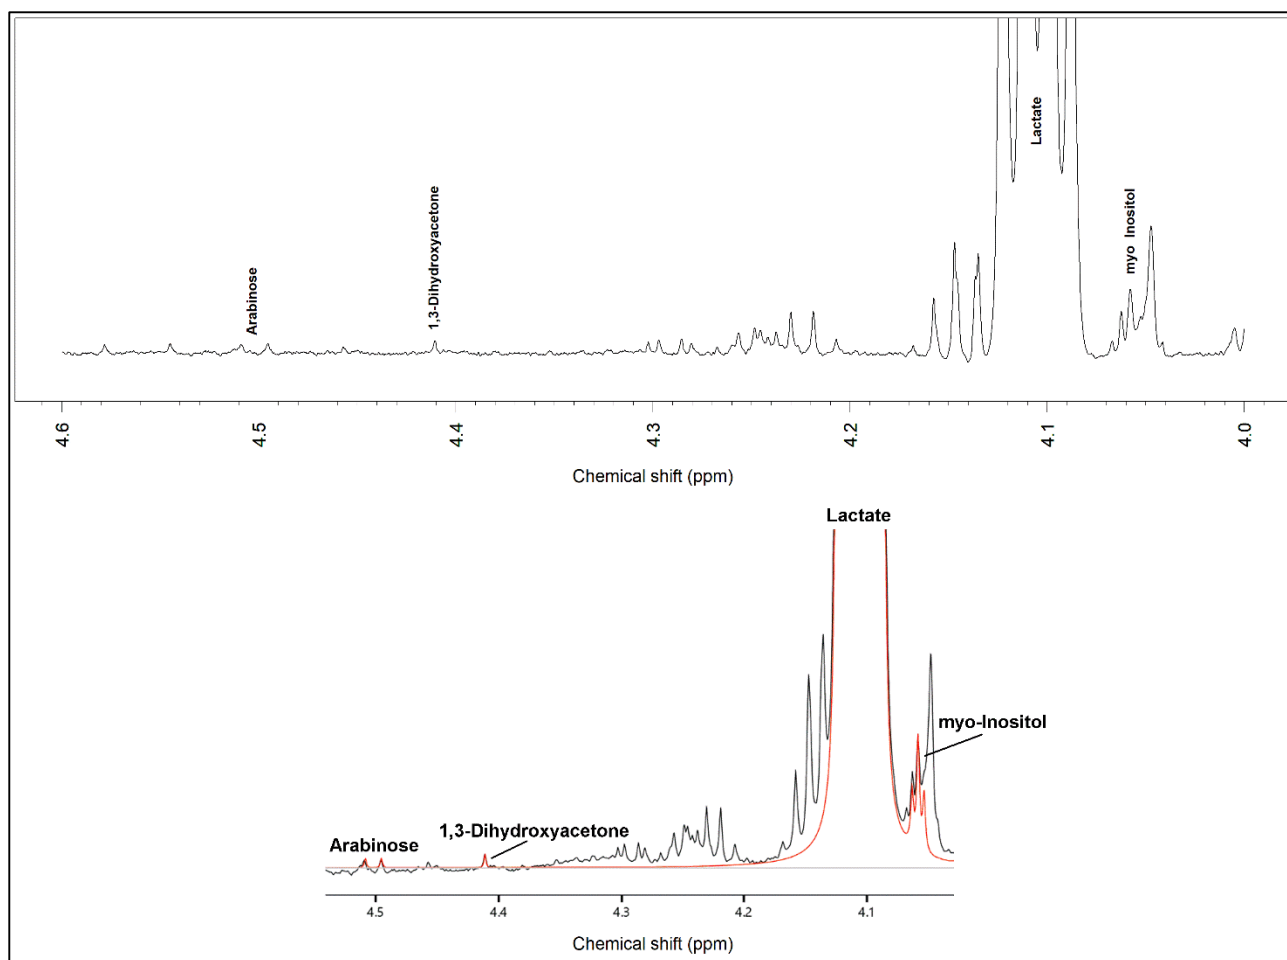



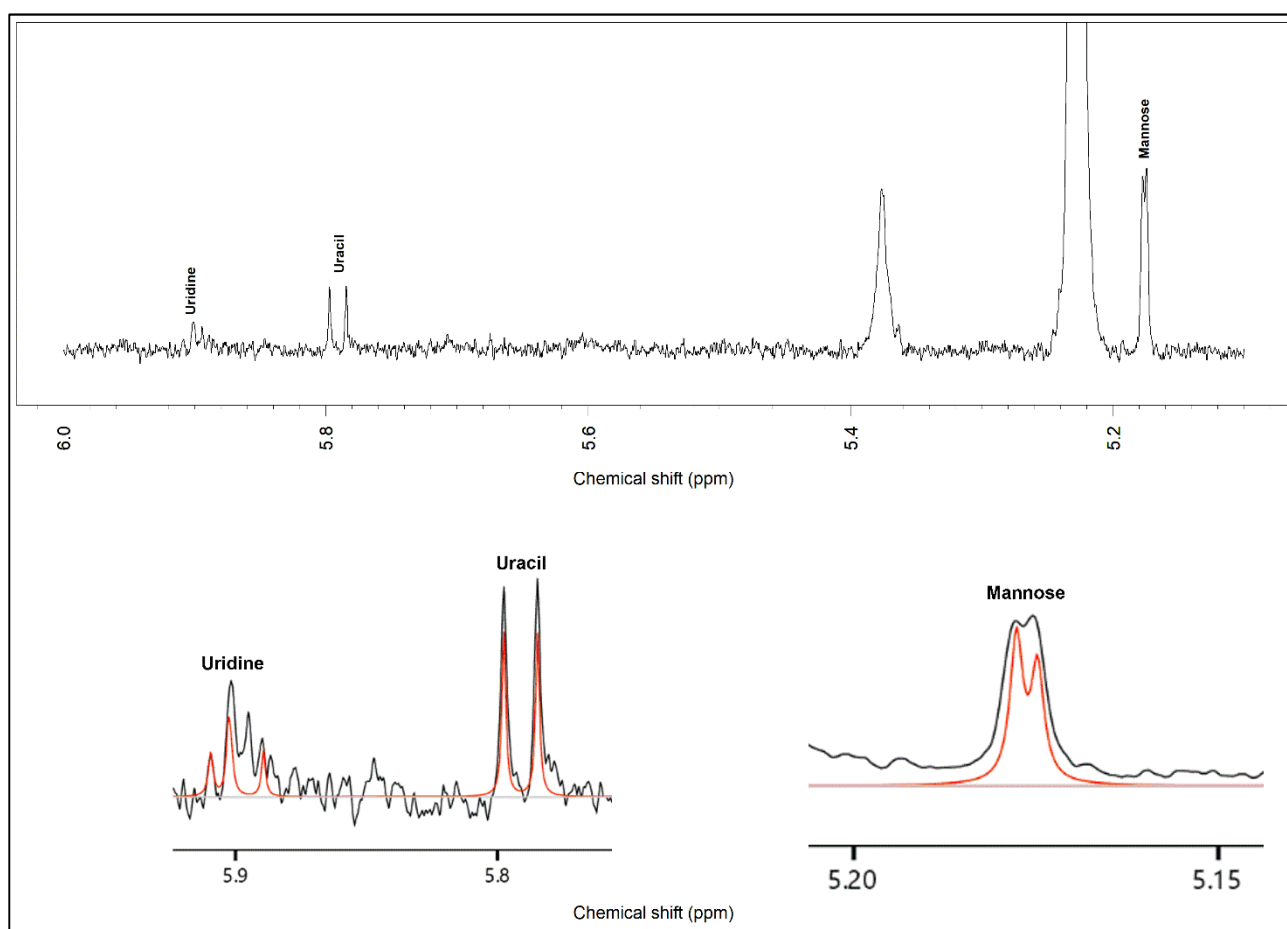

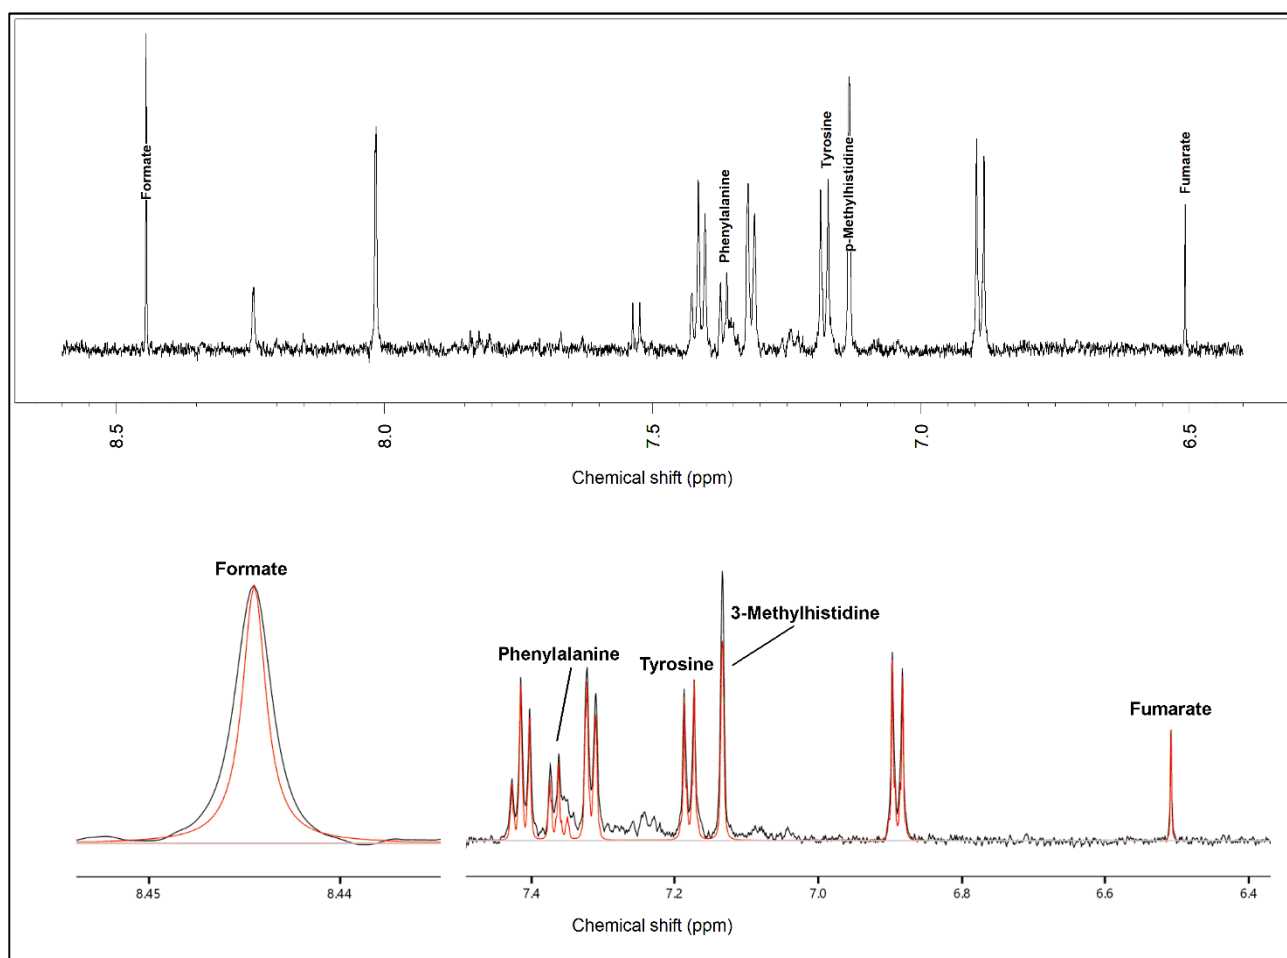

**Yak Feces**

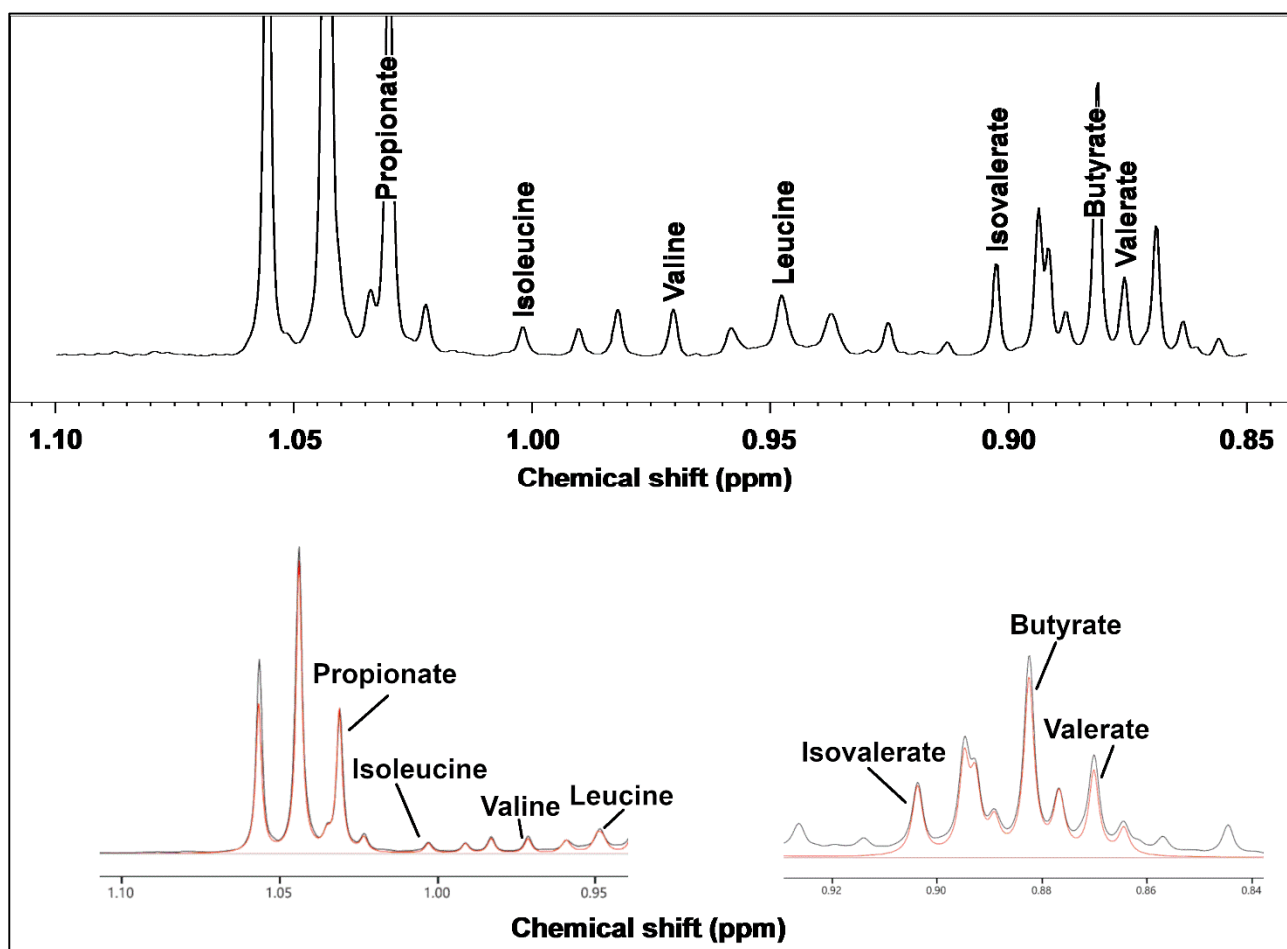

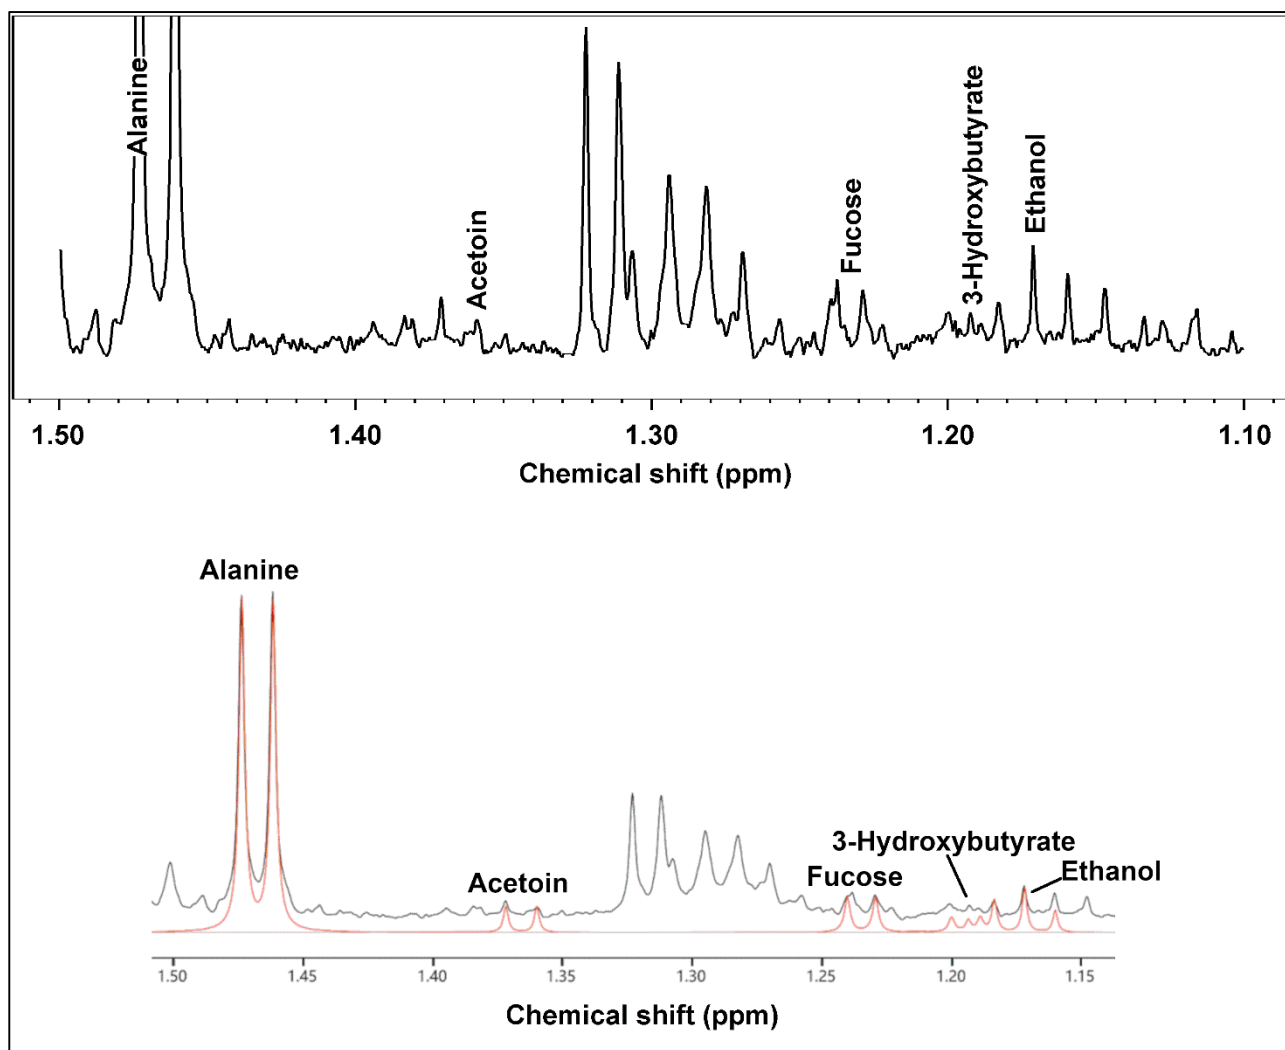

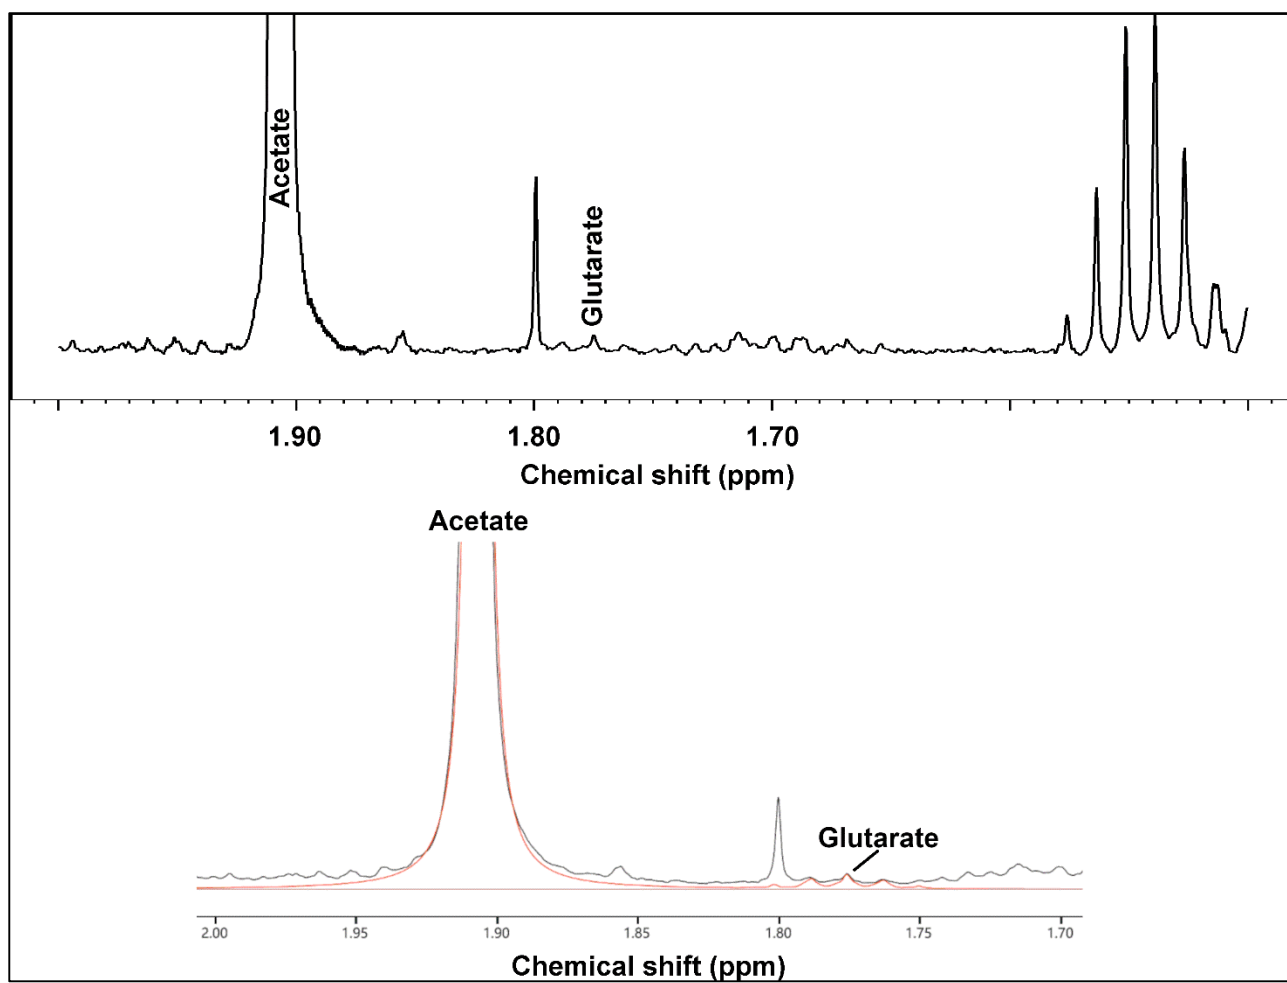

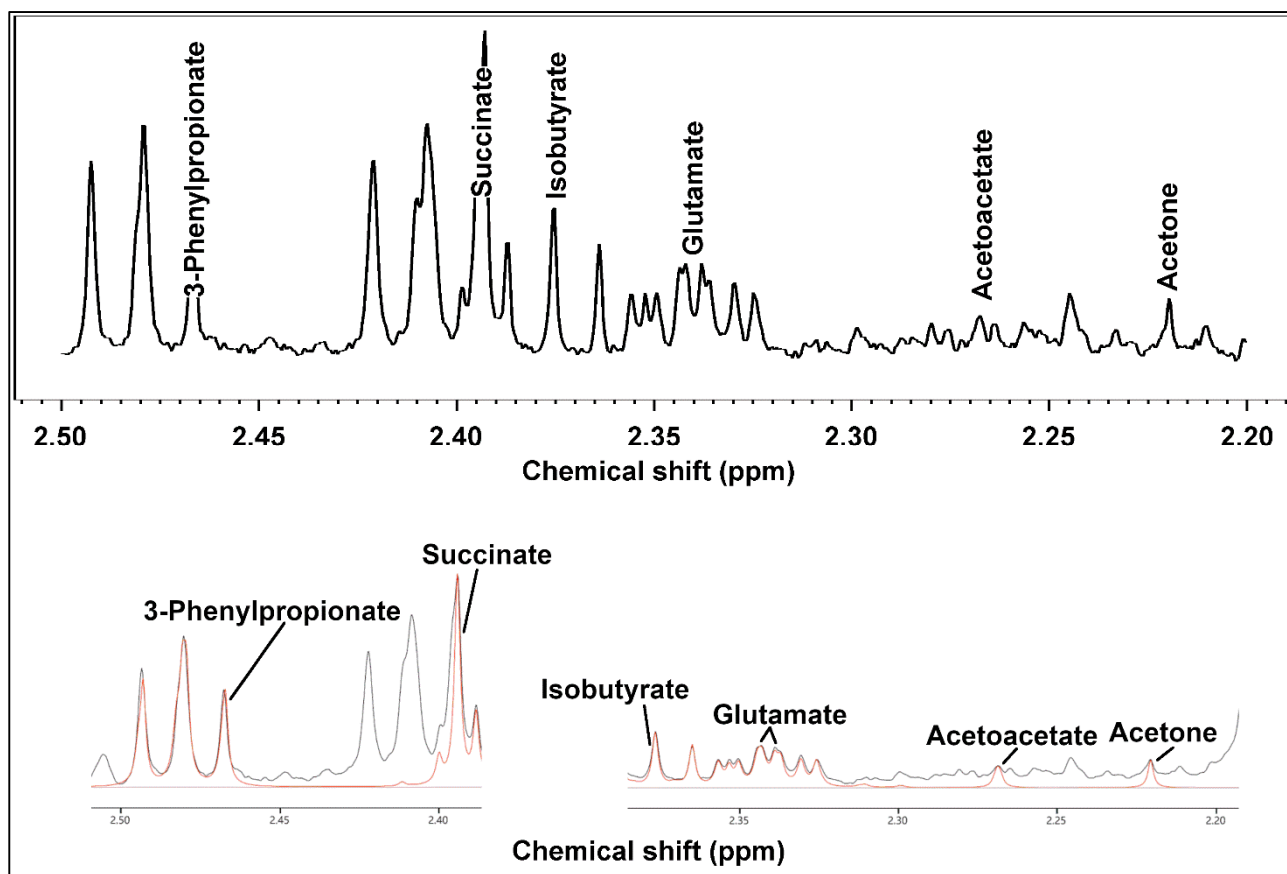

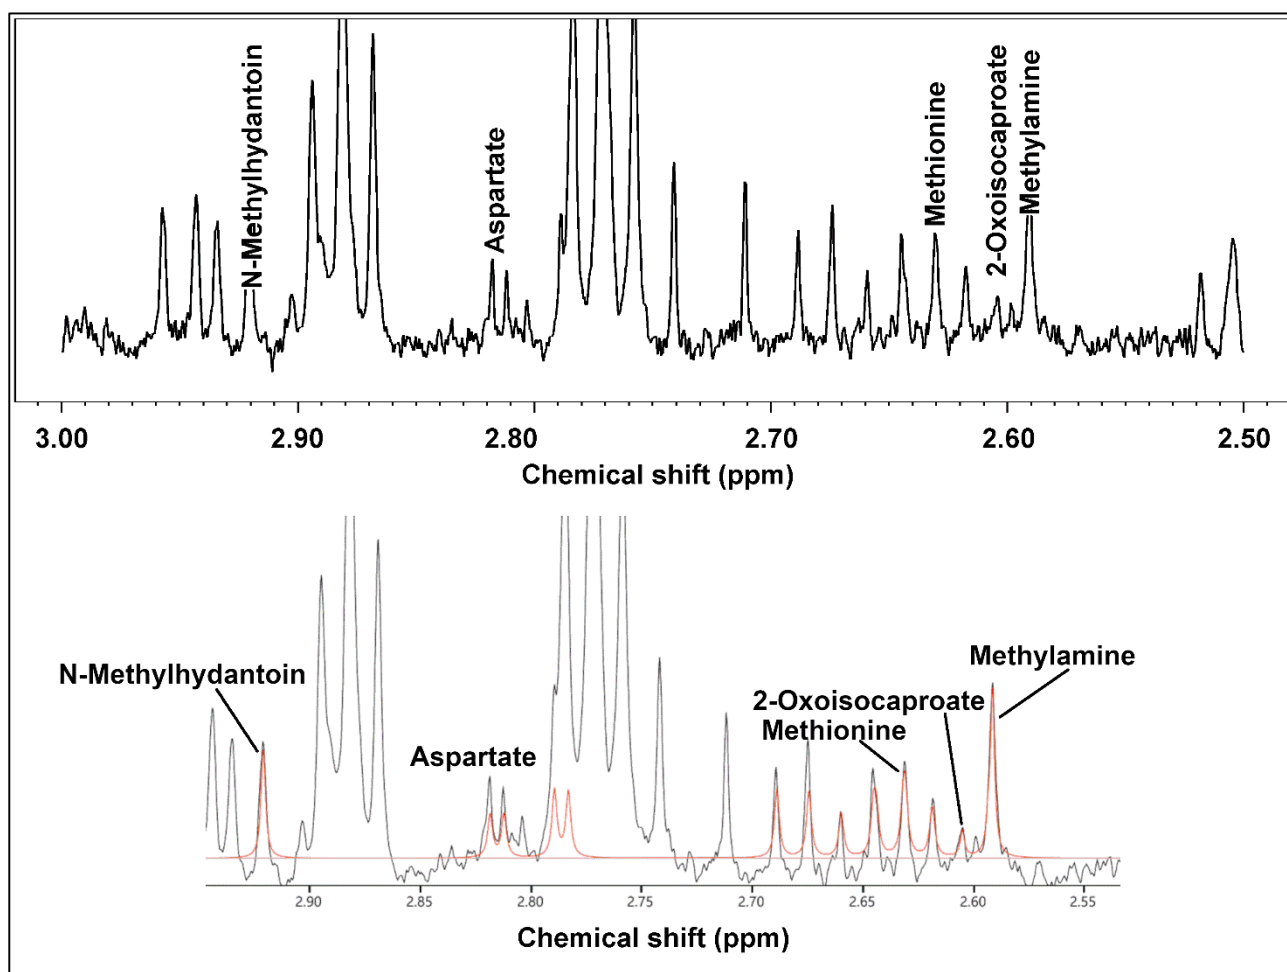

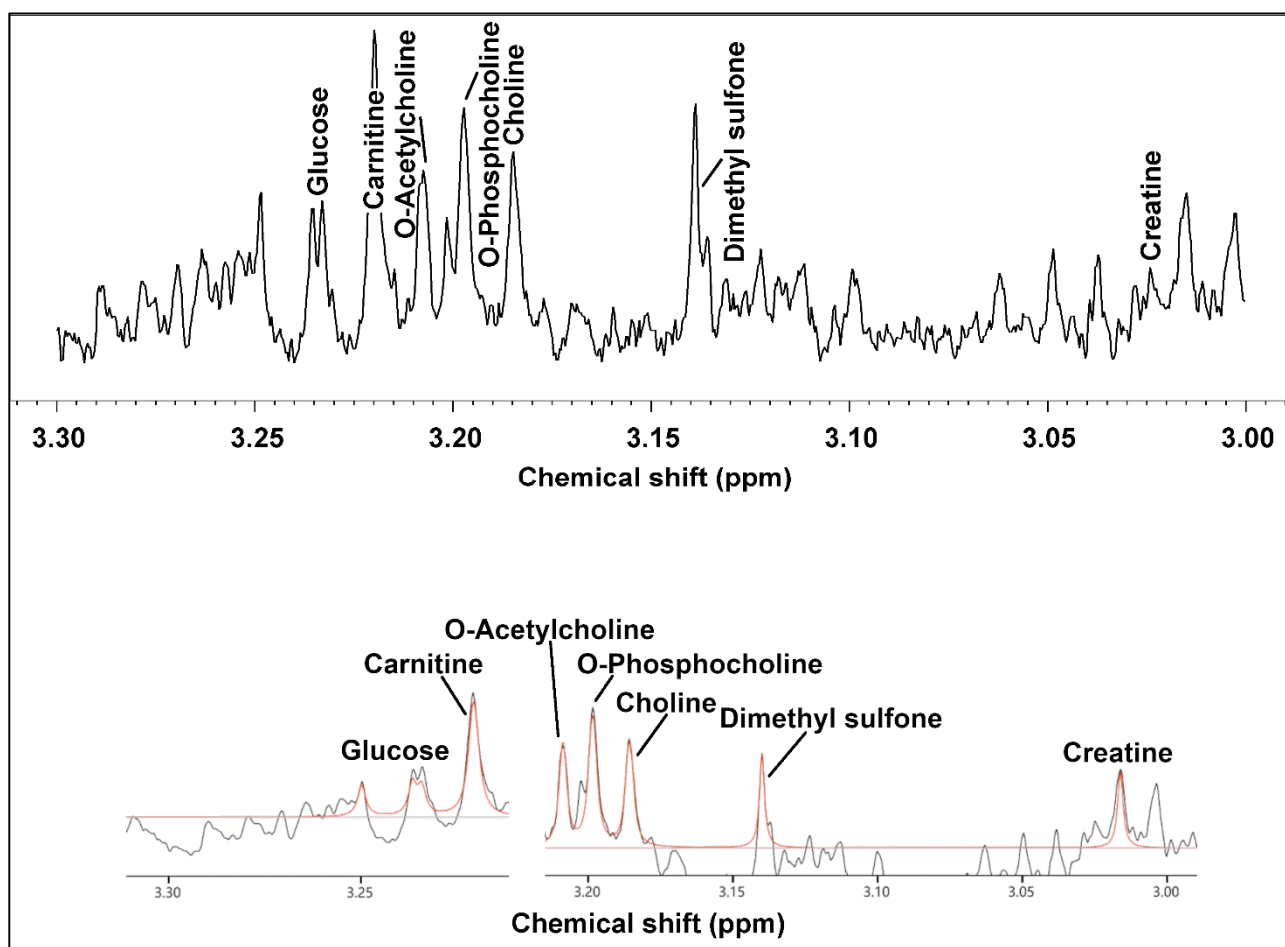



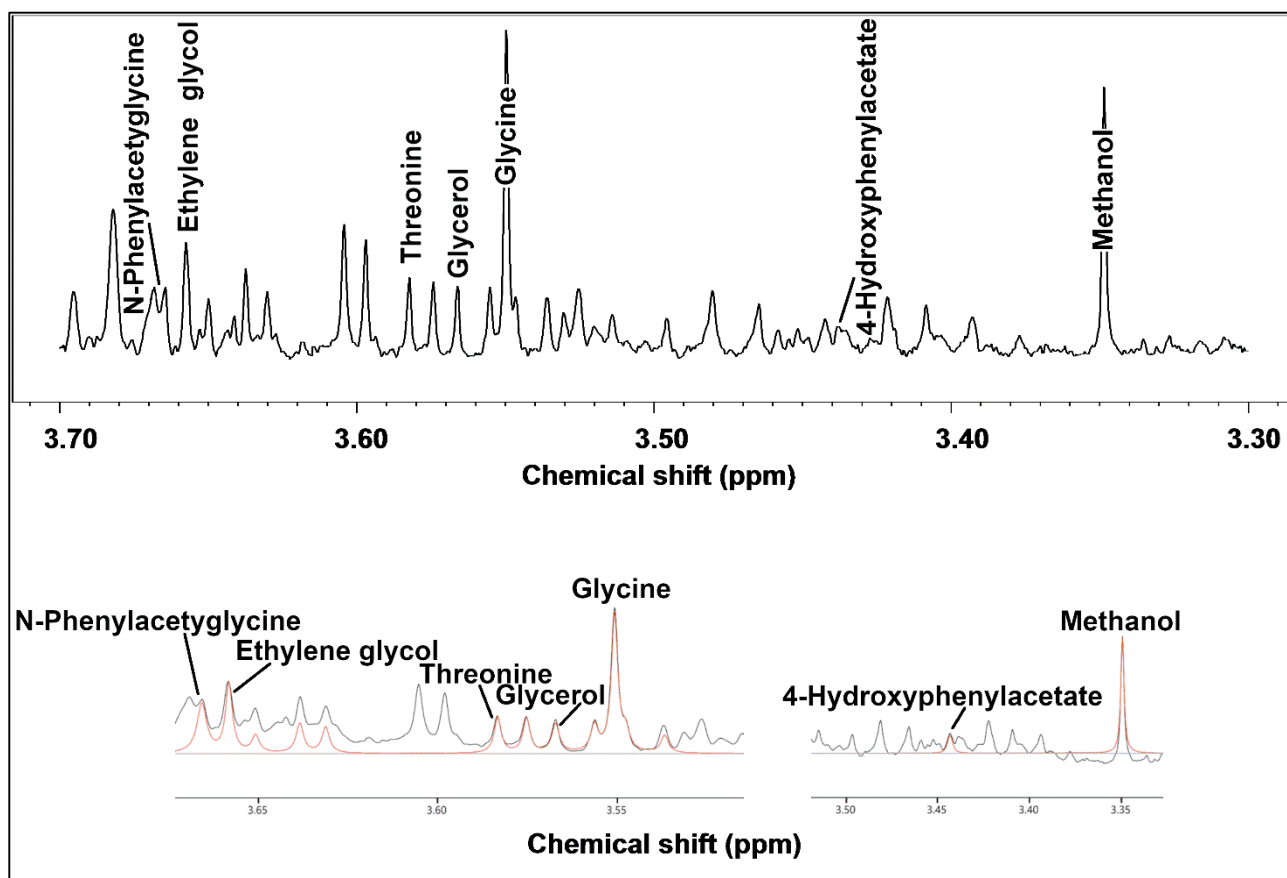

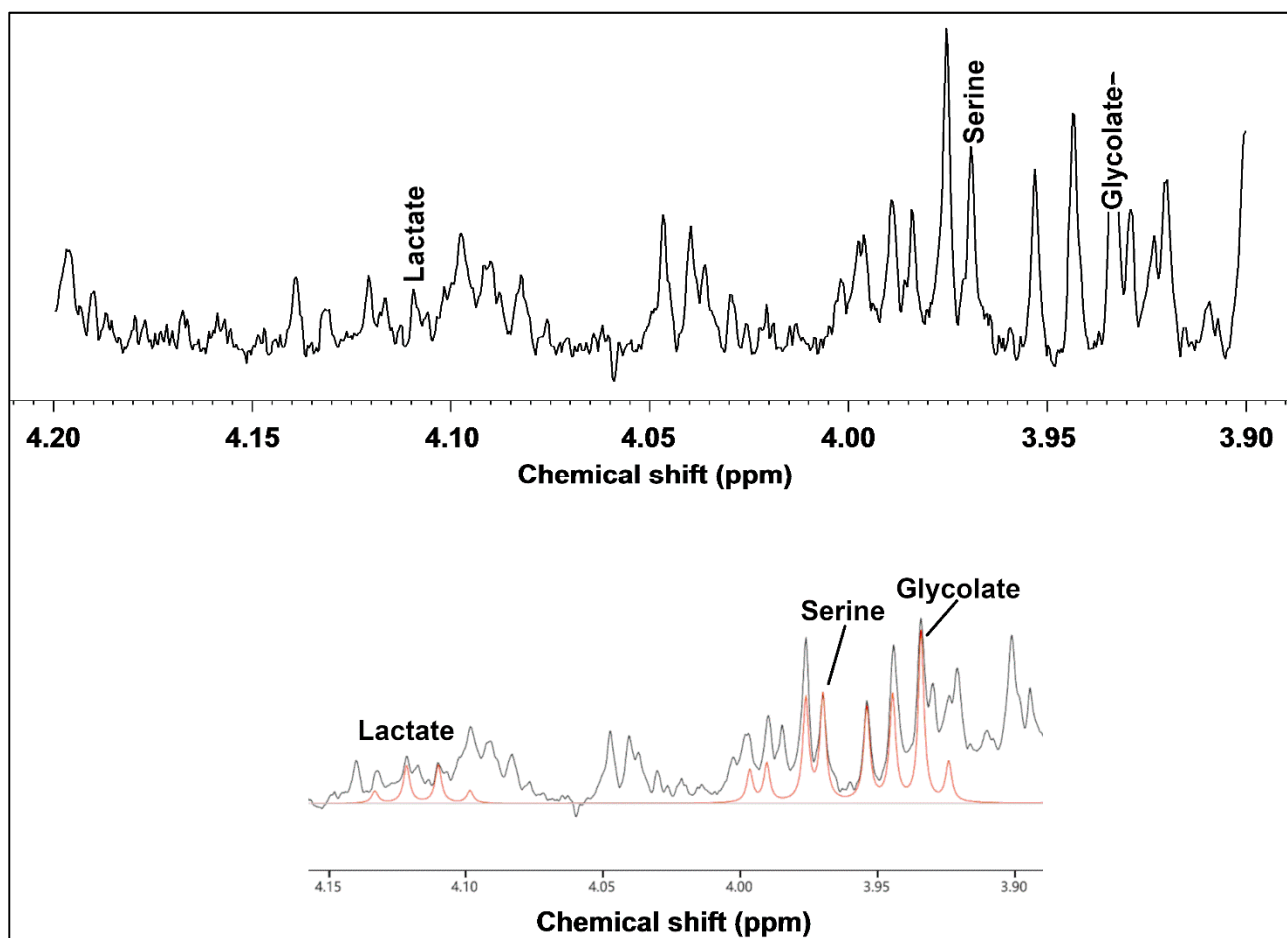

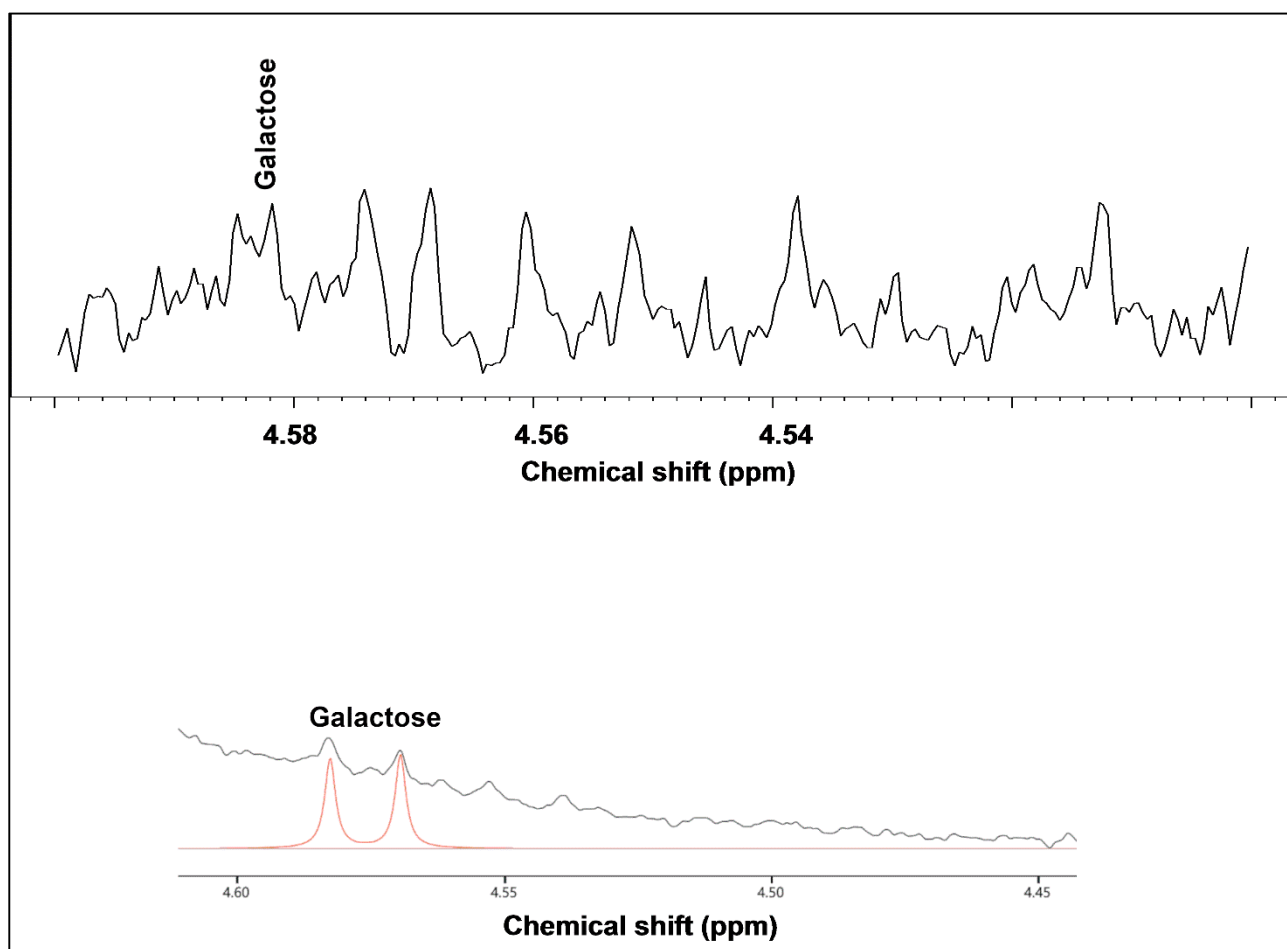

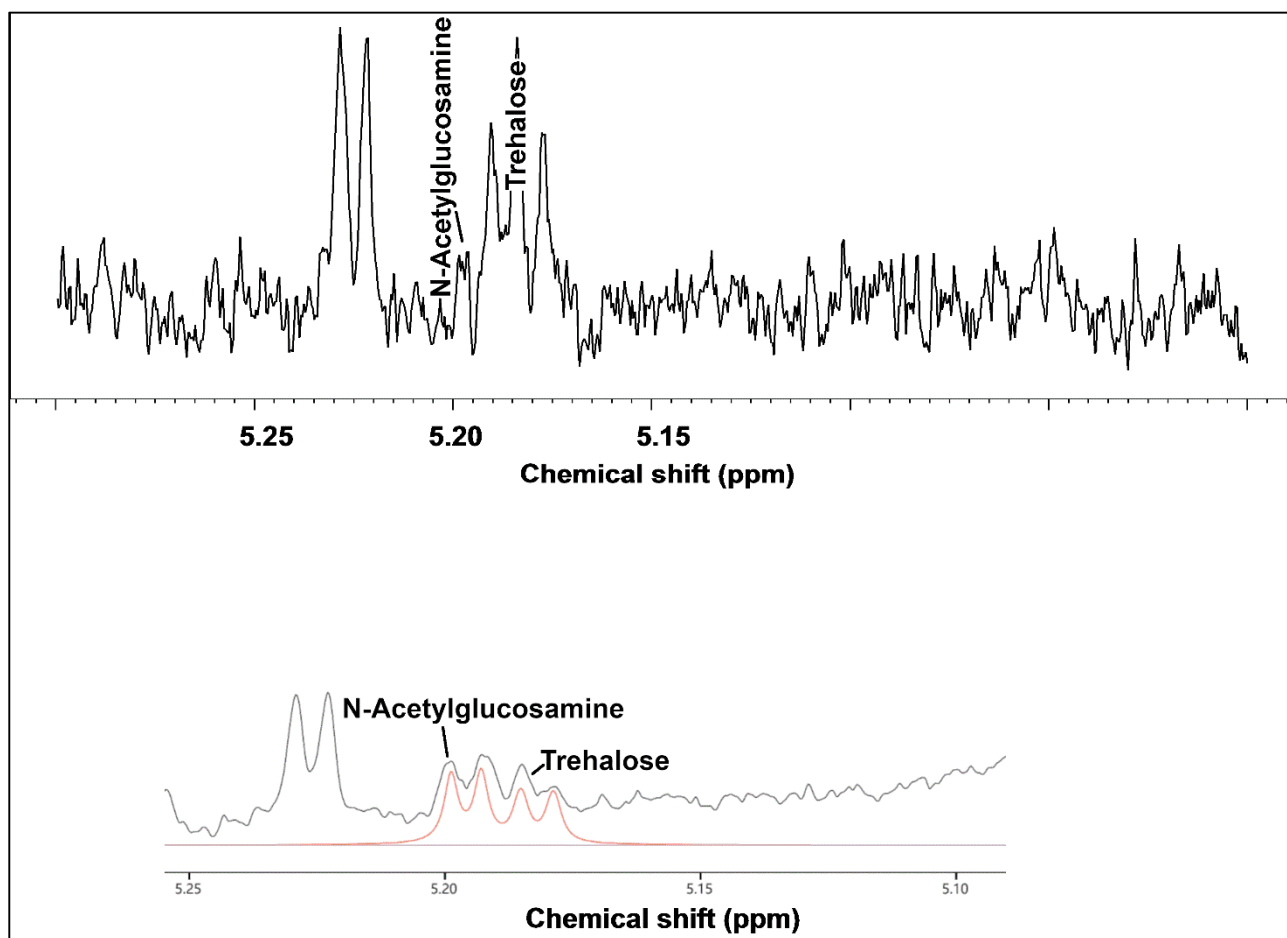

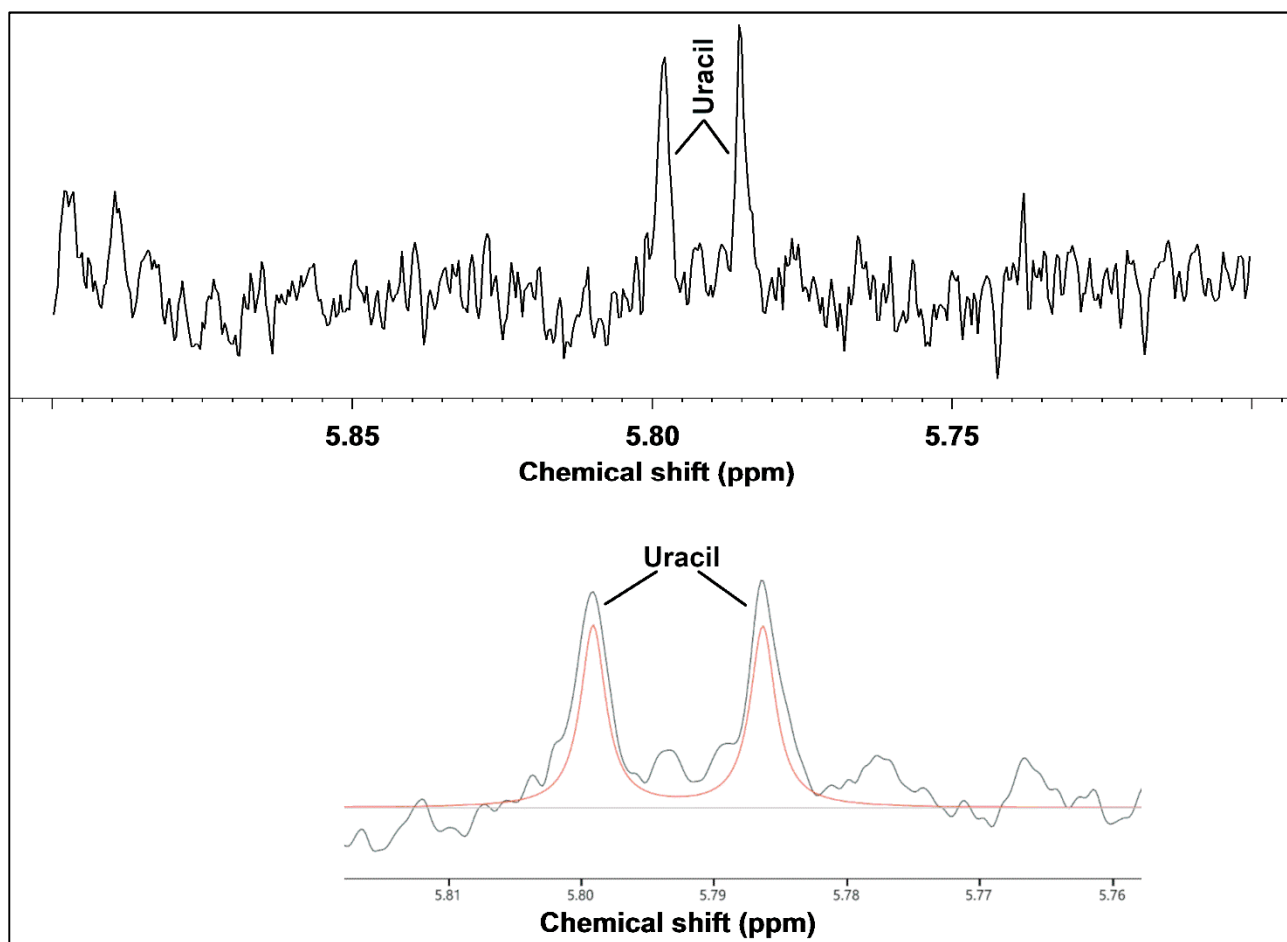

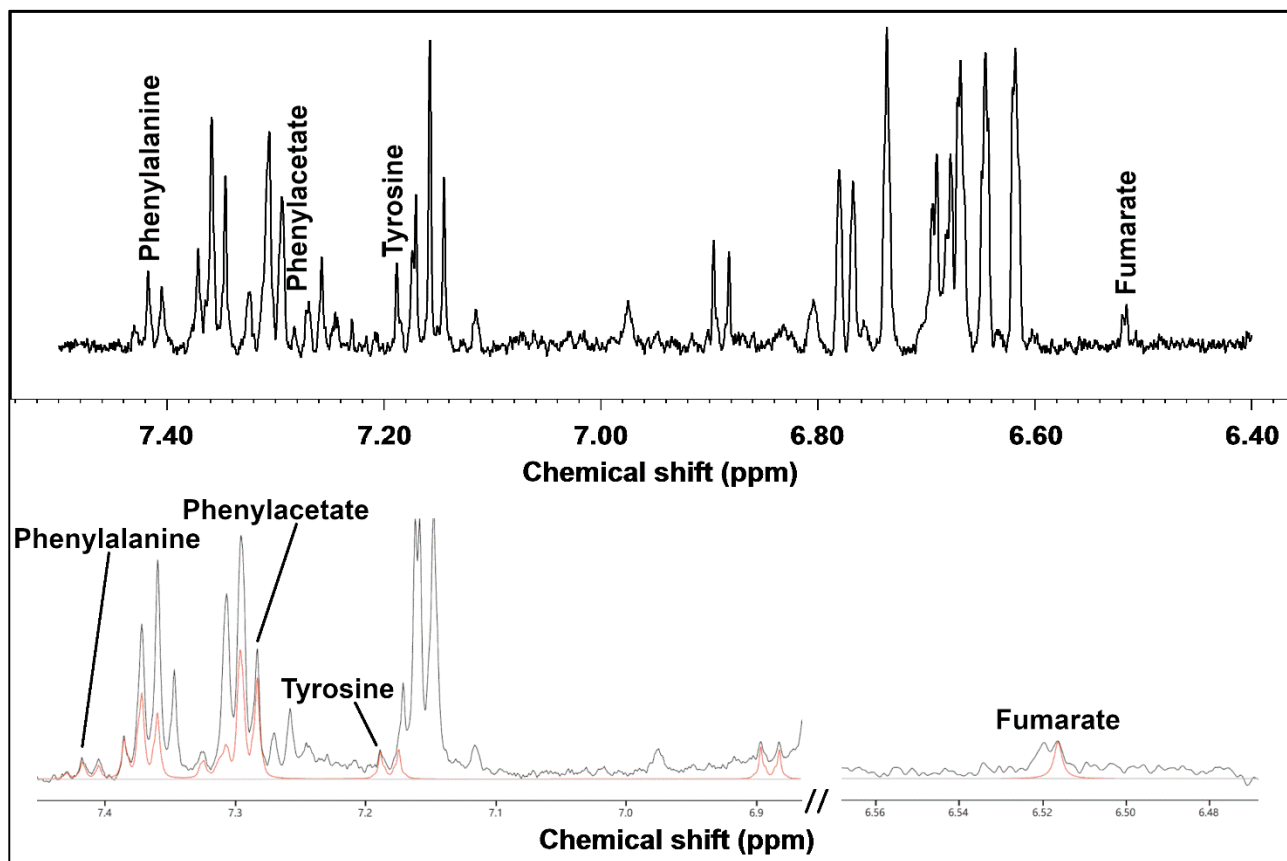

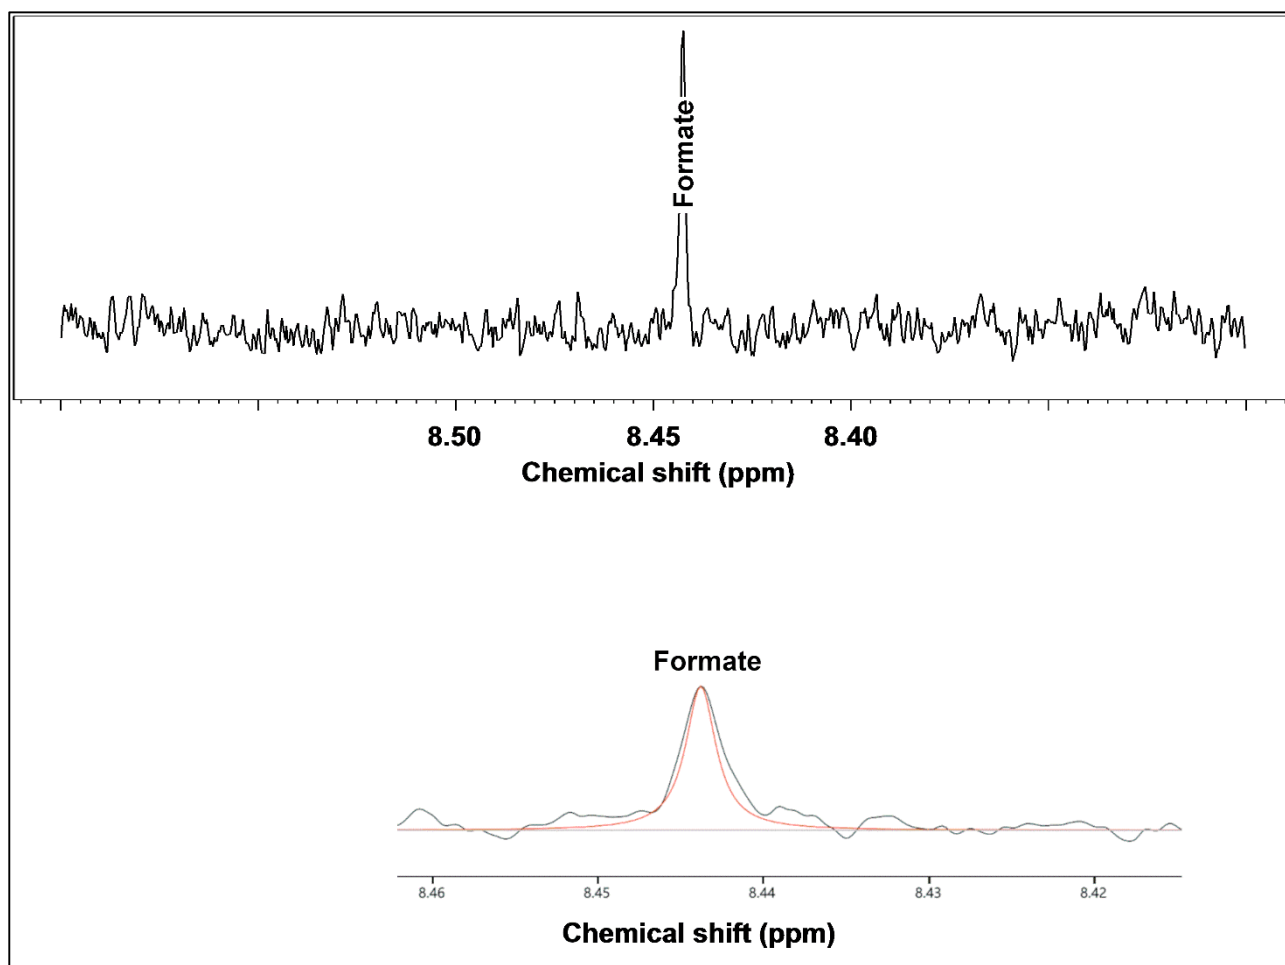

**Yak Urine**

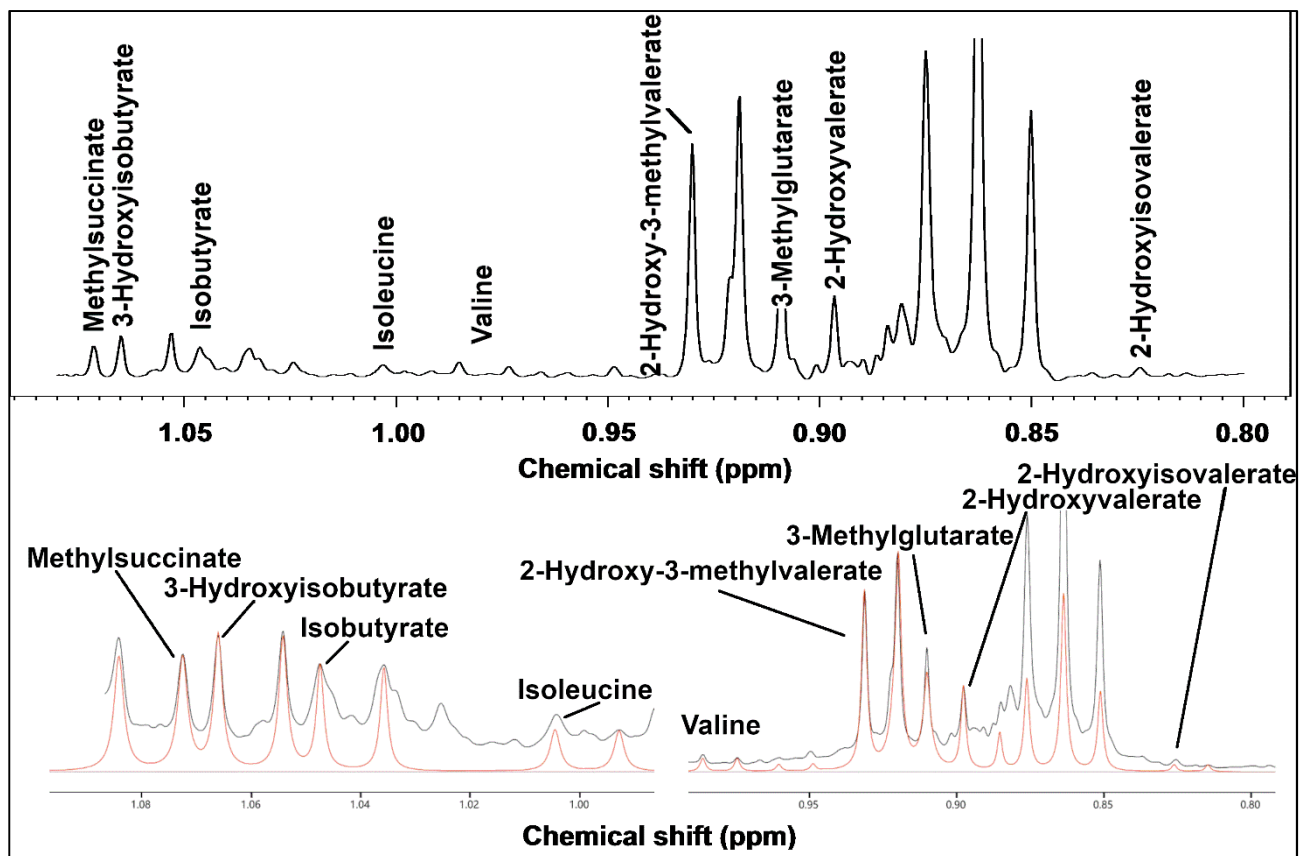

24

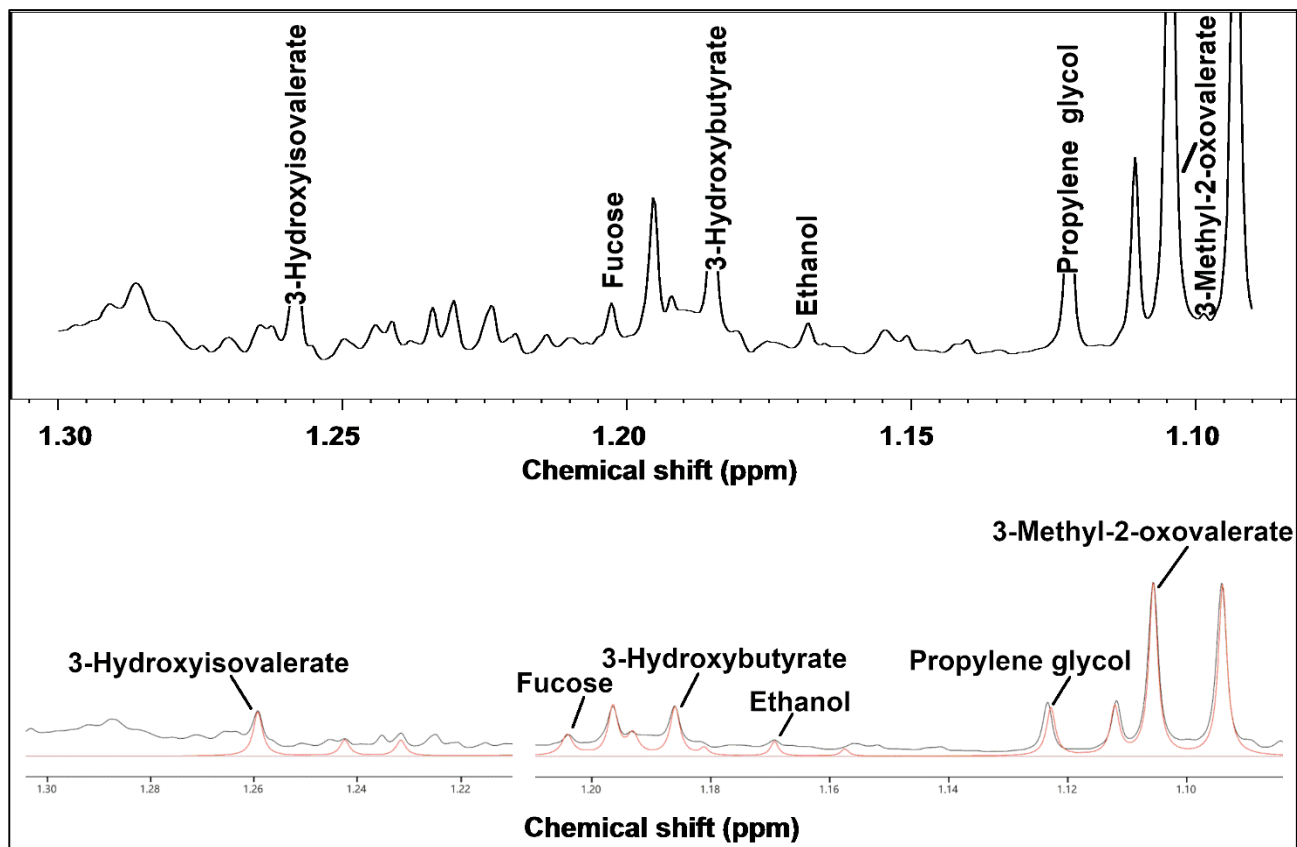

25



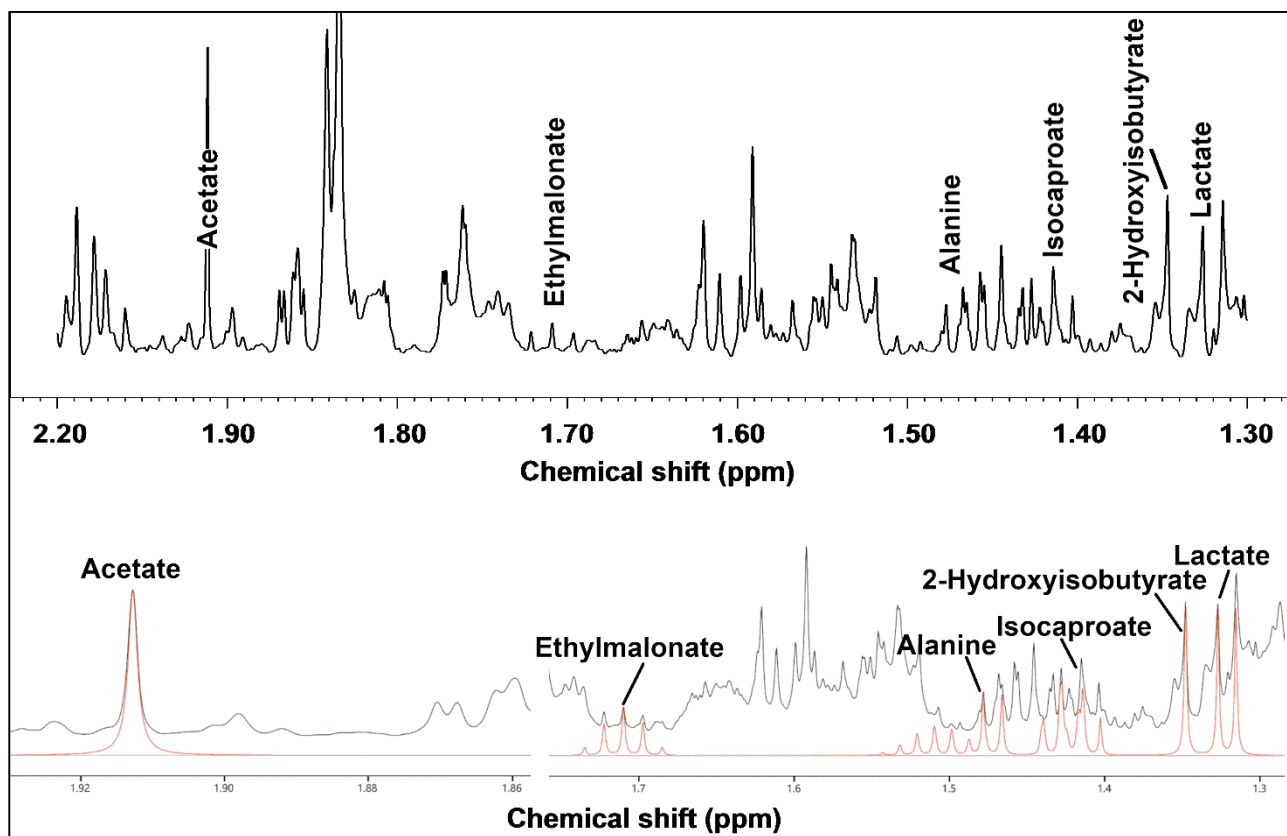

26

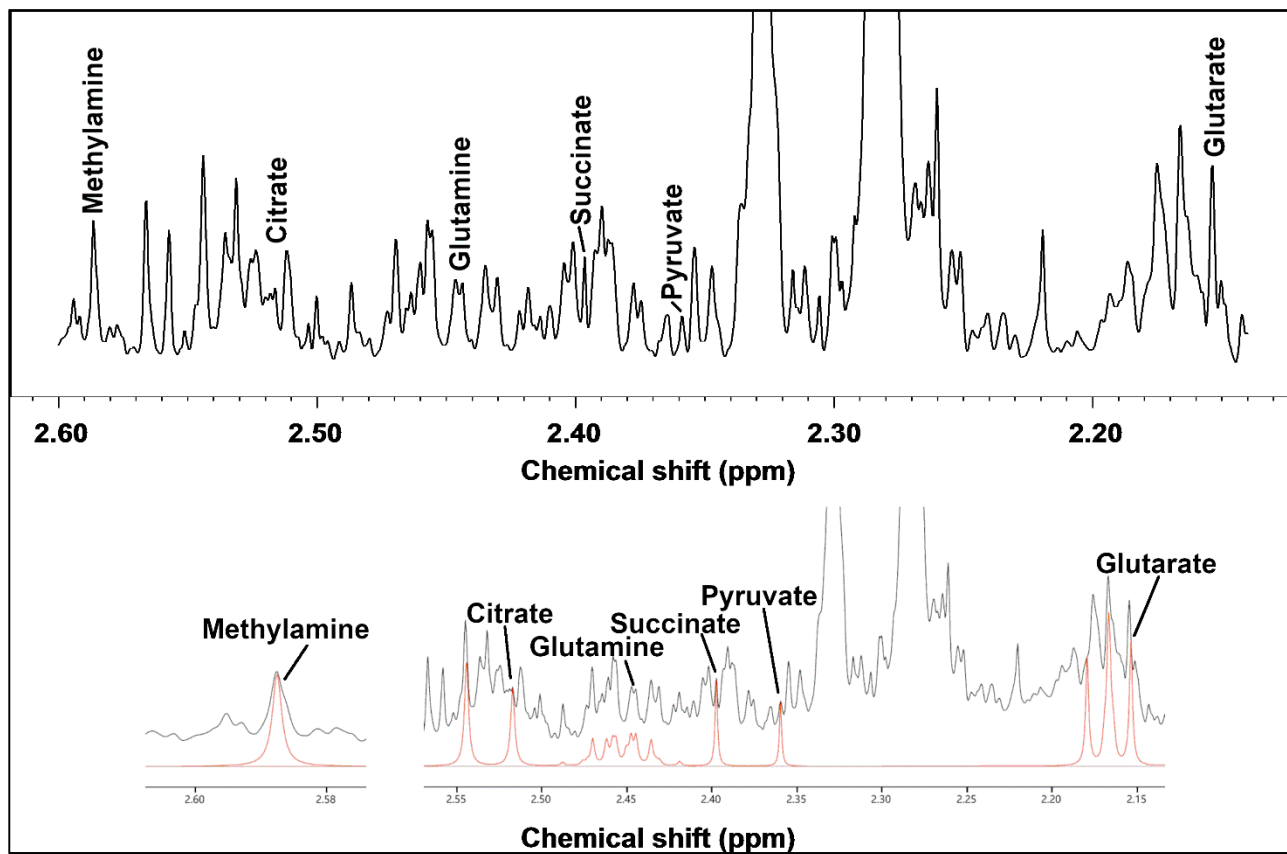

27

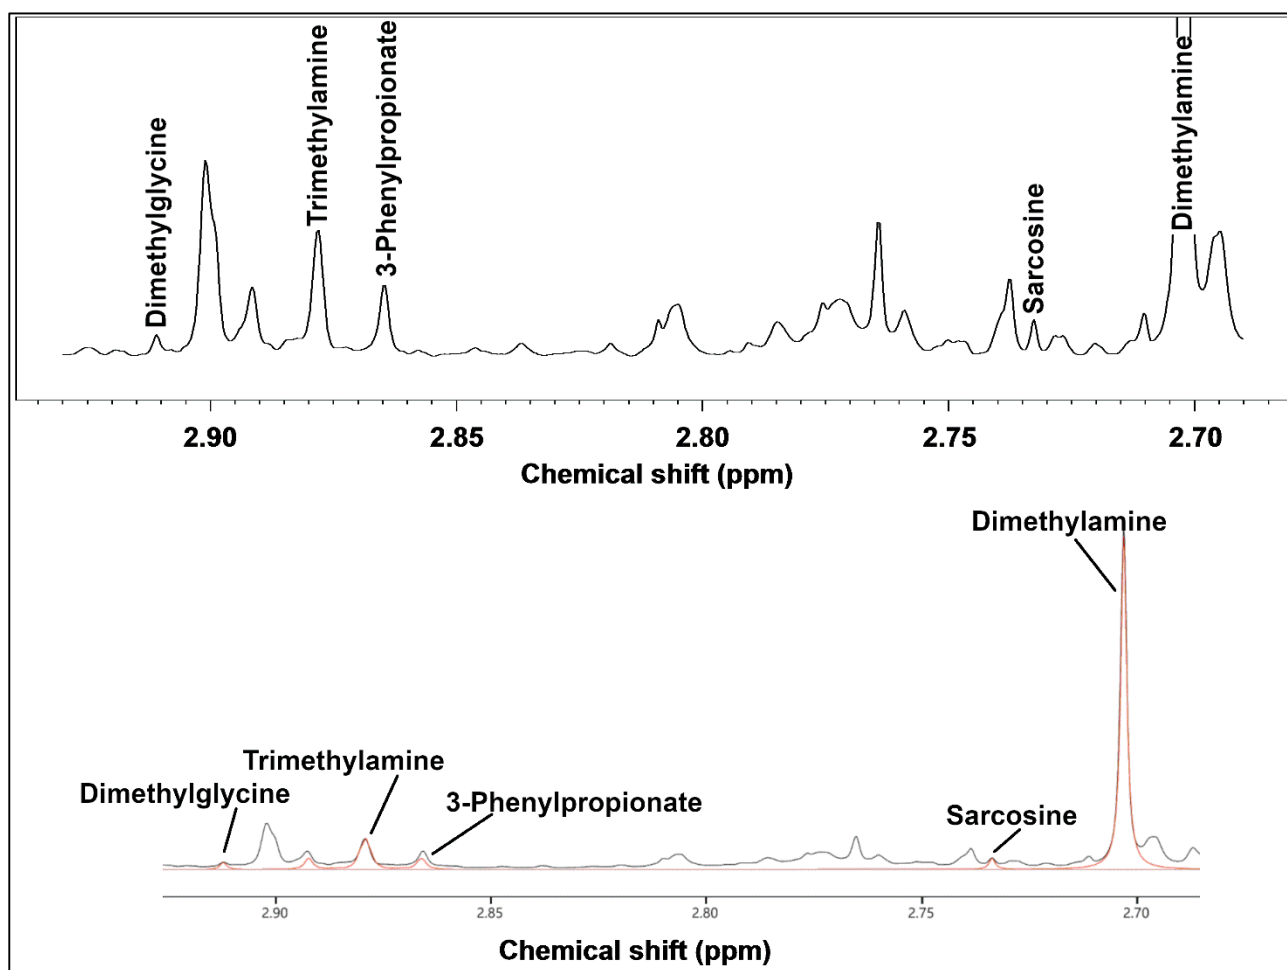

28

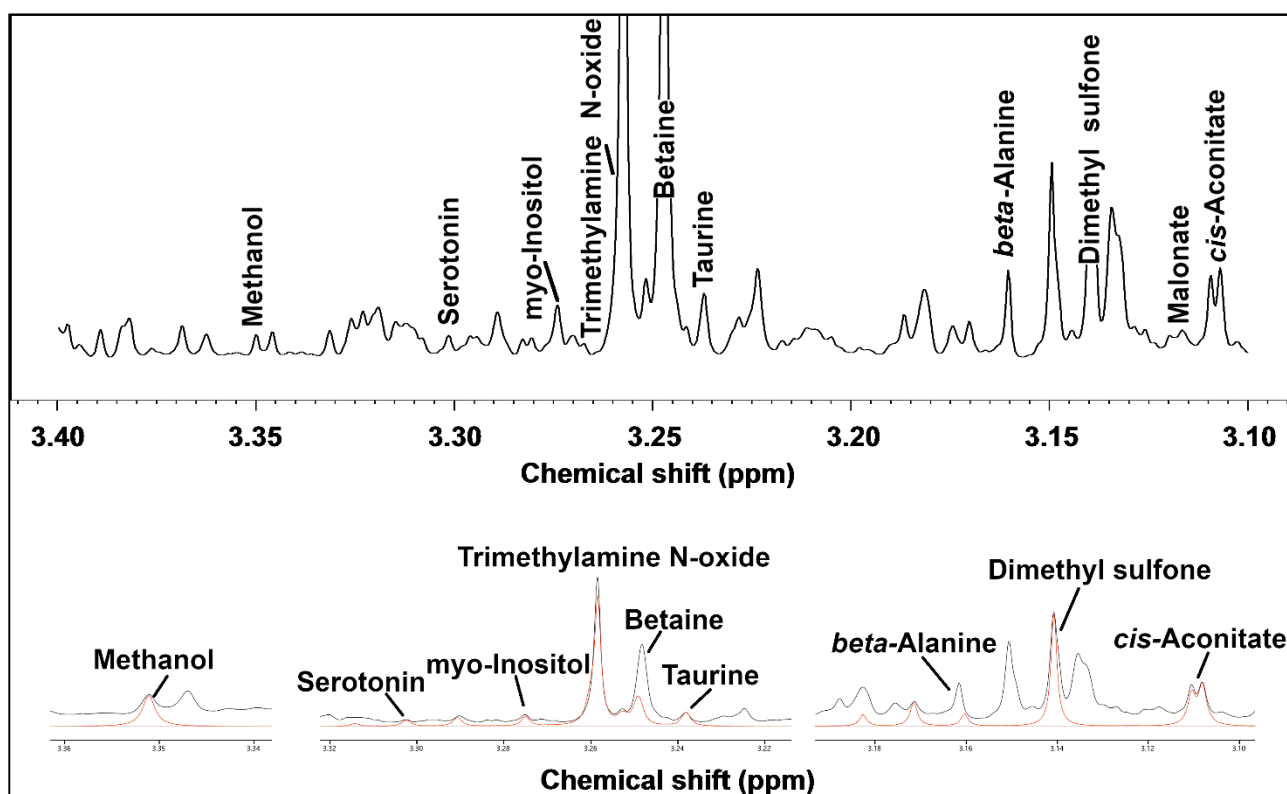

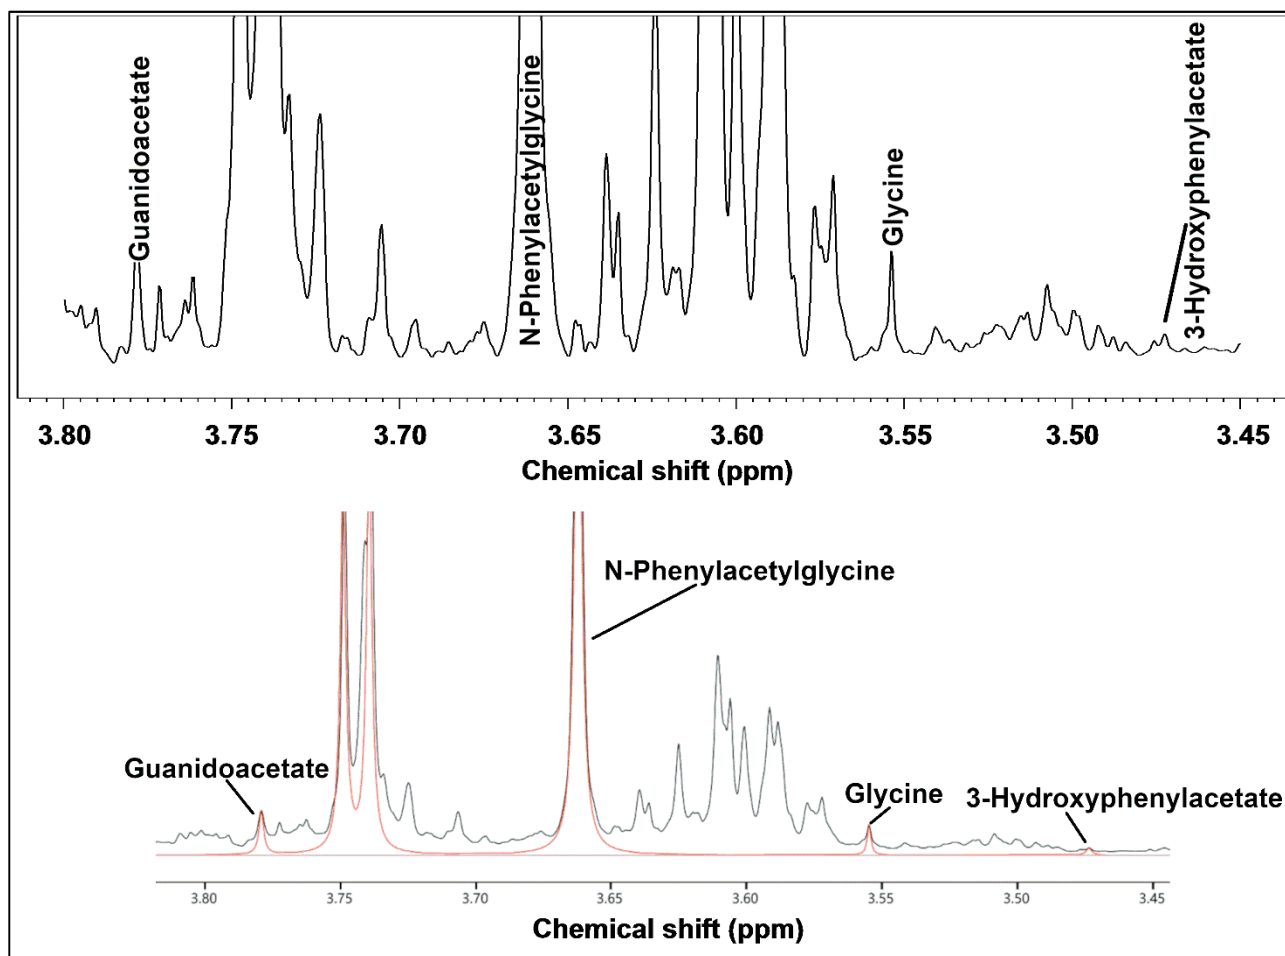

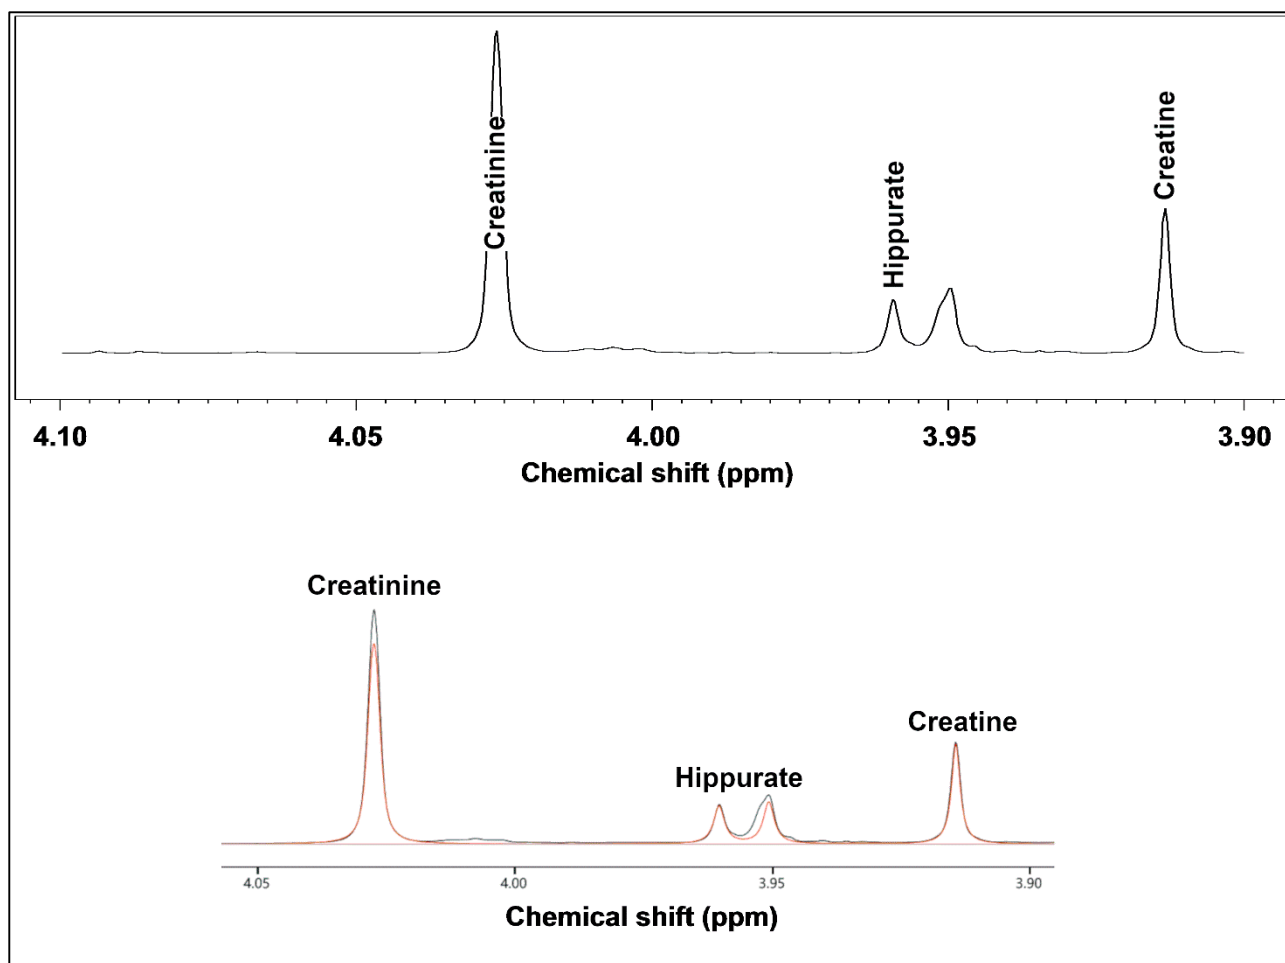

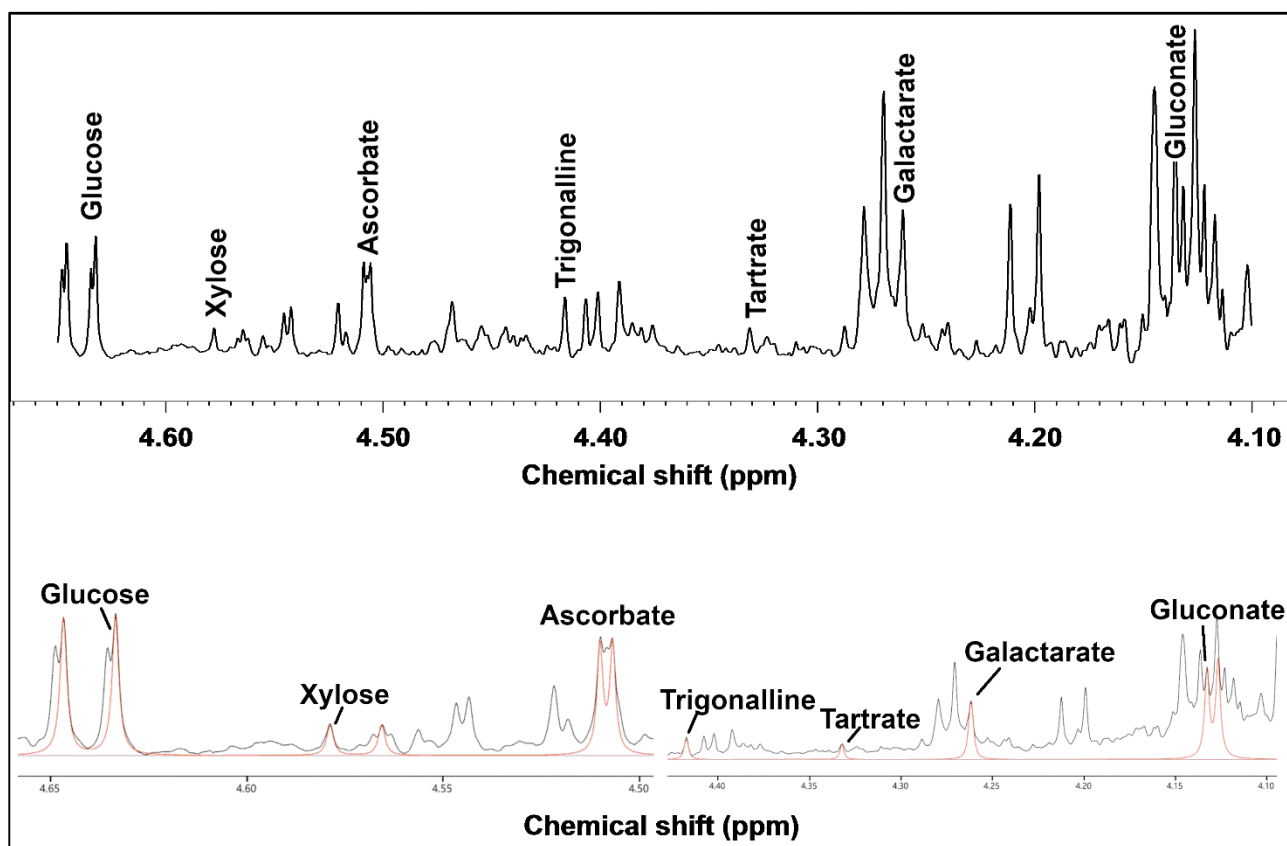

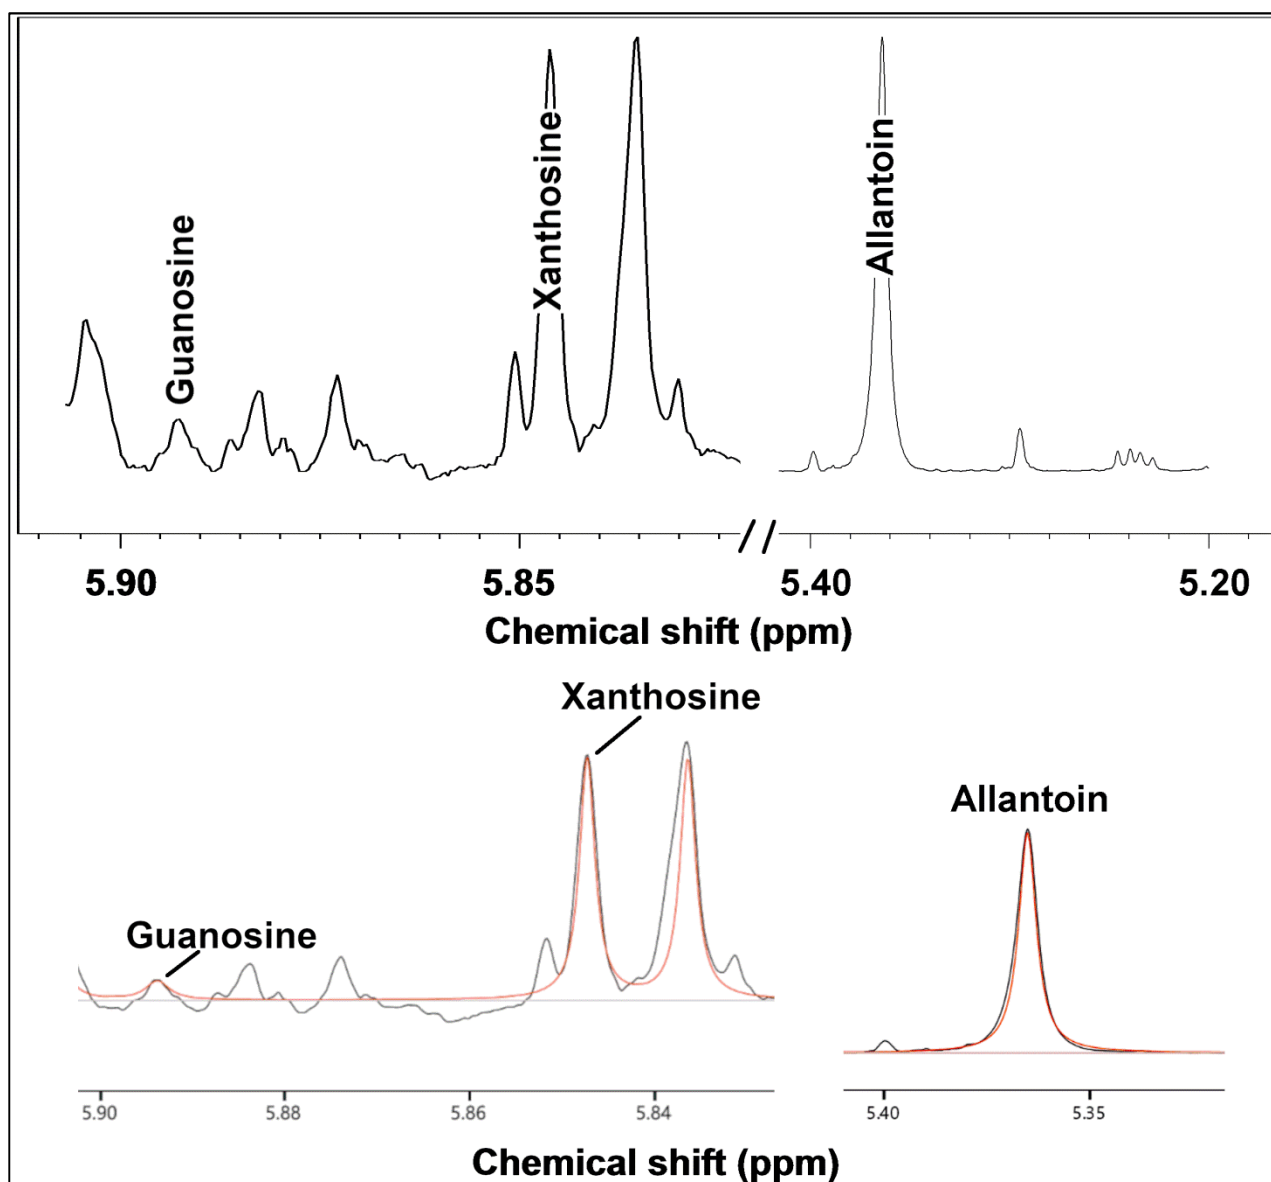

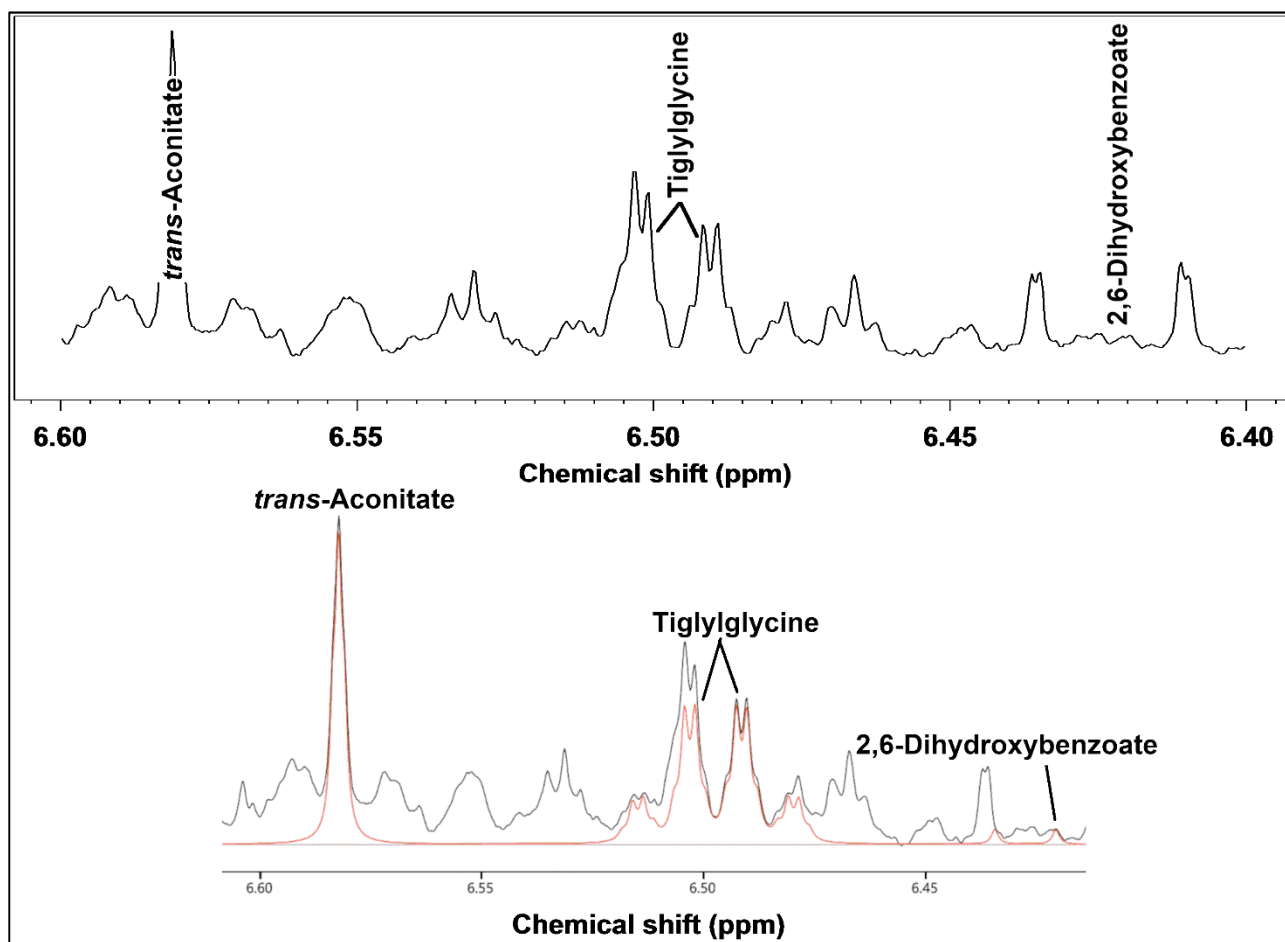

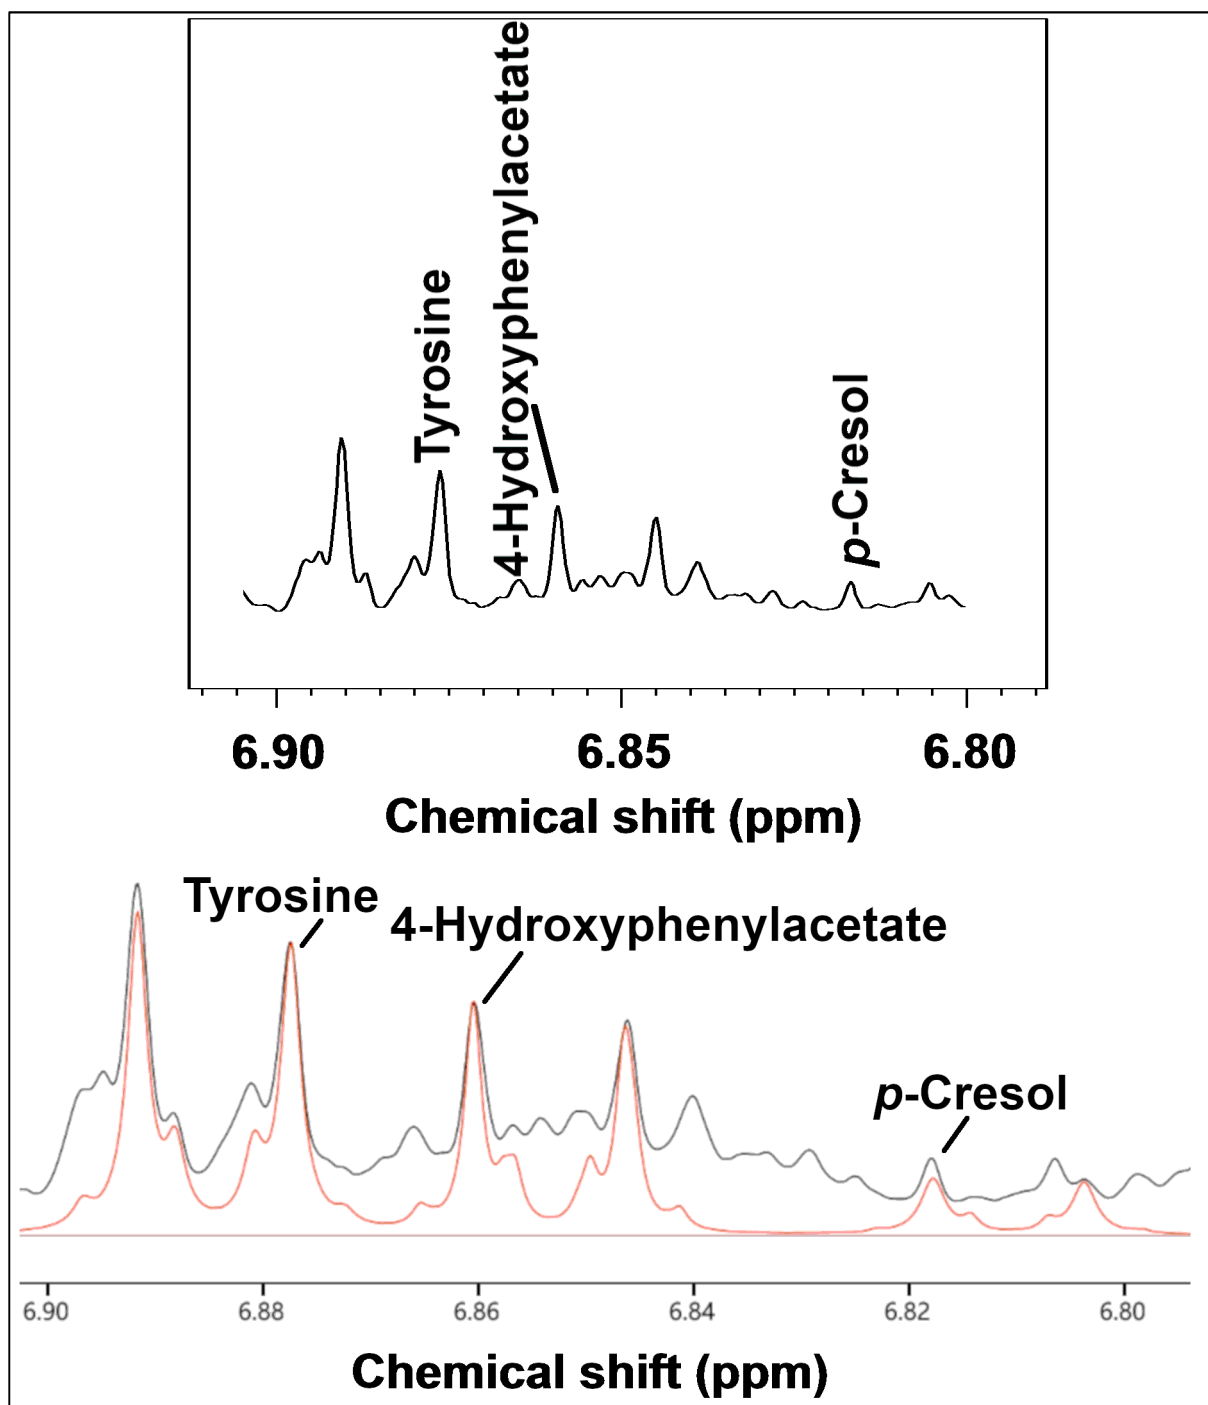



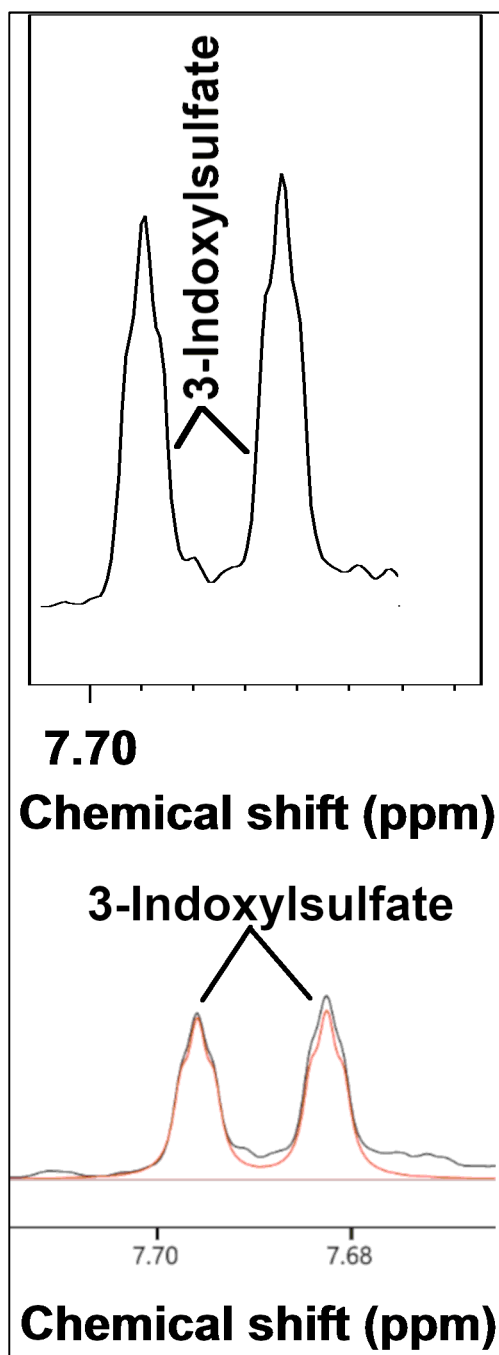

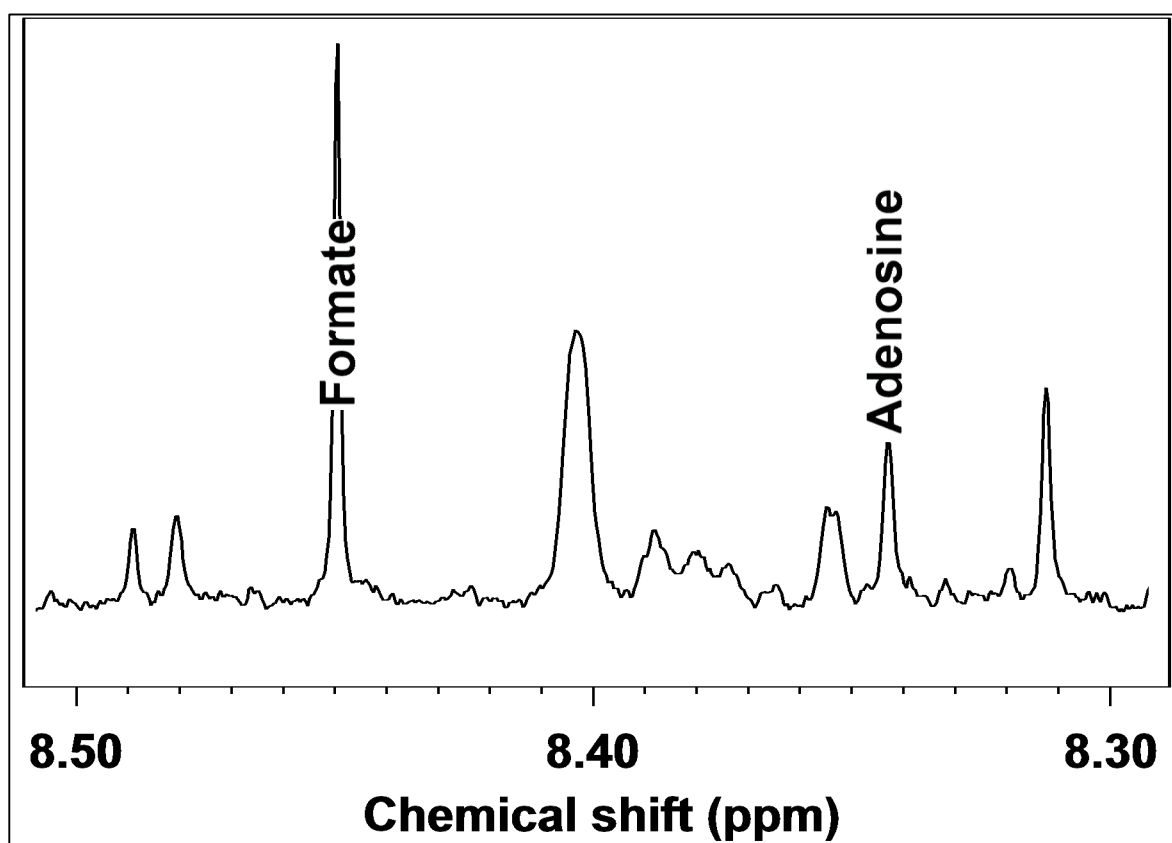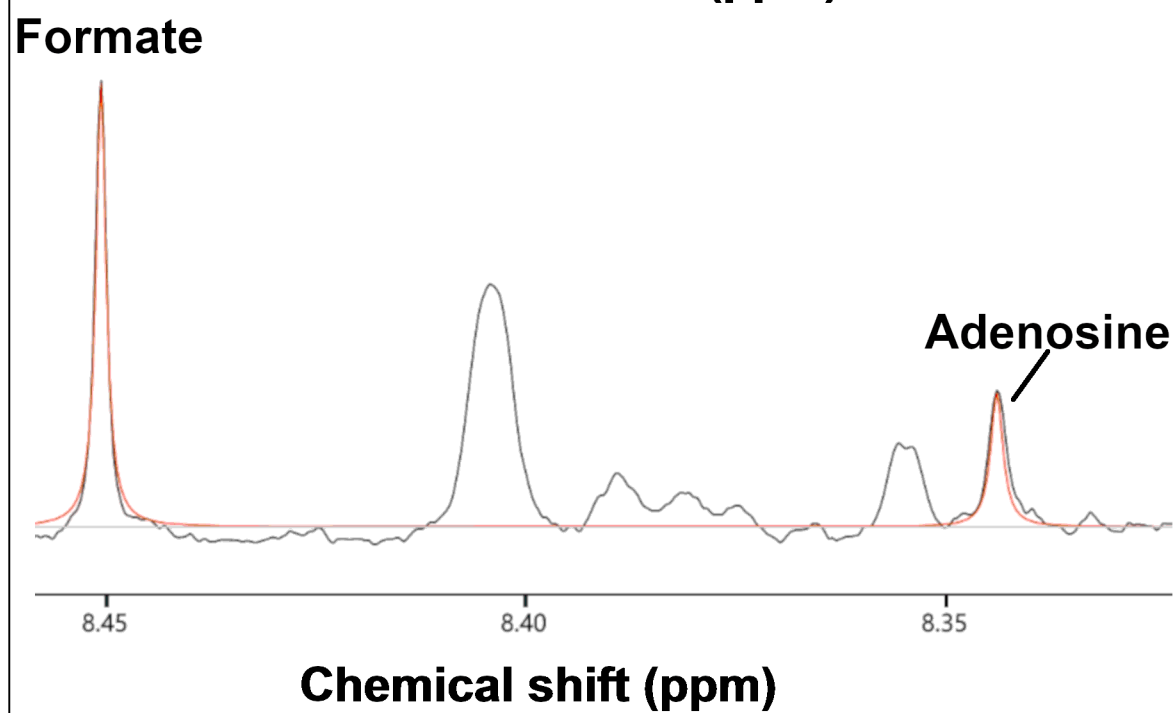

Supplement: s1 [file s1]
